# Supplementary material for: Pilot study of paediatric regional lung function assessment via X-ray velocimetry (XV) imaging in children with normal lungs and in children with cystic fibrosis
Source: PubMed Central journal article supplement — BMJ Open. 2024 Feb 5;14(2):e080034. doi: 10.1136/bmjopen-2023-080034 (PMC10860032; doi:10.1136/bmjopen-2023-080034), 2024-02-05
Supplement: bmjopen-2023-080034.draft_revisions.pdf [file bmjopen-2023-080034.draft_revisions.pdf]

# BMJ Open

BMJ Open is committed to open peer review. As part of this commitment we make the peer review history of every article we publish publicly available.

When an article is published we post the peer reviewers' comments and the authors' responses online. We also post the versions of the paper that were used during peer review. These are the versions that the peer review comments apply to.

The versions of the paper that follow are the versions that were submitted during the peer review process. They are not the versions of record or the final published versions. They should not be cited or distributed as the published version of this manuscript.

BMJ Open is an open access journal and the full, final, typeset and author-corrected version of record of the manuscript is available on our site with no access controls, subscription charges or pay-per-view fees (<http://bmjopen.bmj.com>).

If you have any questions on BMJ Open's open peer review process please email [info.bmjopen@bmj.com](mailto:info.bmjopen@bmj.com)

# BMJ Open

## Feasibility study of paediatric regional lung function assessment via X-ray Velocimetry (XV) imaging in children with normal lungs and in children with cystic fibrosis

|                               |                                                                                                                                                                                                                                                                                                                                                                                                                                                                                                                                                                                                                                                                                           |
|-------------------------------|-------------------------------------------------------------------------------------------------------------------------------------------------------------------------------------------------------------------------------------------------------------------------------------------------------------------------------------------------------------------------------------------------------------------------------------------------------------------------------------------------------------------------------------------------------------------------------------------------------------------------------------------------------------------------------------------|
| Journal:                      | <i>BMJ Open</i>                                                                                                                                                                                                                                                                                                                                                                                                                                                                                                                                                                                                                                                                           |
| Manuscript ID                 | bmjopen-2023-080034                                                                                                                                                                                                                                                                                                                                                                                                                                                                                                                                                                                                                                                                       |
| Article Type:                 | Protocol                                                                                                                                                                                                                                                                                                                                                                                                                                                                                                                                                                                                                                                                                  |
| Date Submitted by the Author: | 19-Sep-2023                                                                                                                                                                                                                                                                                                                                                                                                                                                                                                                                                                                                                                                                               |
| Complete List of Authors:     | Bruorton, Matthew; The University of Adelaide; Women's and Children's Health Network<br>Donnelley, Martin; The University of Adelaide; The University of Adelaide<br>Goddard, Thomas; The University of Adelaide; Women's and Children's Health Network<br>O'Connor, Antonia; Sydney Children's Hospitals Network, Sleep Department; University of New South Wales<br>Parsons, David; The University of Adelaide; Women's and Children's Health Network<br>Phillips, Jessica; Women's and Children's Health Network; The University of Adelaide<br>Carson-Chahhoud, Kristin; The University of Adelaide<br>Tai, Andrew; The University of Adelaide; Women's and Children's Health Network |
| Keywords:                     | Cystic fibrosis < THORACIC MEDICINE, Paediatric radiology < RADIOLOGY & IMAGING, Respiratory Function Test, Chest imaging < RADIOLOGY & IMAGING                                                                                                                                                                                                                                                                                                                                                                                                                                                                                                                                           |
|                               |                                                                                                                                                                                                                                                                                                                                                                                                                                                                                                                                                                                                                                                                                           |

SCHOLARONE™  
Manuscripts

OFFICIAL

# Protocol: Feasibility study of paediatric regional lung function assessment via X-ray Velocimetry (XV) imaging in children with normal lungs and in children with cystic fibrosis

Authors:

Matthew Bruorton<sup>1,2</sup>, Kristin Carson-Chahhoud<sup>1,3,4</sup>, Martin Donnelley<sup>1,5</sup>, Thomas Goddard<sup>1,2</sup>, Antonia O'Connor<sup>6,7</sup>, David Parsons<sup>1,2,5</sup>, Jessica Phillips<sup>2,5</sup> and Andrew Tai<sup>1,2,5</sup>

Corresponding author:

Matthew Bruorton – matthew.bruorton@adelaide.edu.au

Affiliations:

- 1- Adelaide Medical School, The University of Adelaide, Adelaide, SA, Australia
- 2- Respiratory and Sleep Medicine, Women's and Children's Hospital, North Adelaide, SA, Australia
- 3- Translational Medicine and Technology Group, Australian Centre for Precision Health, University of South Australia, Adelaide, Australia
- 4- South Australian Health and Medical Research Institute, Adelaide, Australia
- 5- Robinson Research Institute, The University of Adelaide, Adelaide, SA, Australia
- 6- Sleep Department, Sydney Children's Hospital, Randwick, NSW, Australia
- 7- Faculty of Medicine and Health, University of New South Wales, Sydney, NSW, Australia

Abstract:

**Introduction:** Cystic fibrosis (CF) is a life-limiting autosomal recessive genetic condition. It is caused by mutations in the gene that encodes for a chloride and bicarbonate conducting transmembrane channel. X-ray Velocimetry (XV) is a novel form of X-ray imaging that can generate lung ventilation data through the breathing cycle. XV technology has been validated in multiple animal models, including the  $\beta$ -ENaC mouse model of cystic fibrosis lung disease. It has since been assessed in early-phase clinical trials in adult human subjects, however there is a paucity of data in the paediatric cohort, including in CF. The aim of this feasibility study is to conduct a single-centre cohort study in paediatric patients with CF and in those with normal lungs, to demonstrate the appropriateness of proceeding with further studies of XV in these cohorts.

**Methods and analysis:** This is a prospective, single-centre, feasibility cohort study. It will recruit children aged 3 to 18 years to have XV lung imaging performed, as well as paired pulmonary function testing. The study will aim to recruit 20 children without cystic fibrosis with normal lungs, and 20 children with cystic fibrosis. The primary outcome will be the feasibility of recruiting children and performing XV testing. Secondary outcomes will include comparisons between XV and current assessments of pulmonary function and structure.

**Ethics and dissemination:** This project has ethical approval granted by The Women's and Children's Hospital Human Research Ethics Committee. (HREC ID 2021/HRE00396). Findings will be disseminated through peer-reviewed publication and conferences.

OFFICIAL

## OFFICIAL

## Strengths and limitations of this study

- This is the first study to investigate the use of X-ray Velocimetry in a paediatric Cystic Fibrosis cohort
- This is a new technology which could have significant benefits in this patient group if it is found to be feasible and becomes a clinically-validated tool
- As a pilot study the sample size is small, and the aim and design is well suited to assessment of the feasibility of future XV studies in paediatrics and cystic fibrosis.
- The small study size means that secondary assessments and comparisons of XV and lung function tests may be underpowered

Keywords: Cystic fibrosis, X-ray Velocimetry, ventilation heterogeneity

Word count: 3553

## Introduction

### Cystic fibrosis

Cystic fibrosis is a life-limiting autosomal recessive genetic condition, with an incidence of approximately 1 in 2500 in the Caucasian population[1, 2]. It is caused by mutations in the gene that encodes for the cystic fibrosis transmembrane conductance regulator (*CFTR*), affecting chloride as well as bicarbonate ion transmembrane channel activity[1, 3]. Cystic fibrosis is a multi-system disorder, with *CFTR* dysfunction causing issues in the lung, pancreas, liver, bowel, sweat glands and vas deferens, amongst others.

There have been significant advances in the care of cystic fibrosis. In the 1950's median life expectancy was only a few months, with mortality mainly due to meconium ileus and malnutrition secondary to exocrine pancreatic insufficiency[1]. There has been a progressive increase in life expectancy over the past six to seven decades, with multidisciplinary care advances and more recently the introduction of highly effective modulator therapies. In Australia, the median survival is now over 50 years of age[2].

With improved treatment of early complications and the use of pancreatic enzyme replacement, the primary morbidity and mortality is now related to pulmonary pathology, including bronchiectasis, small airway obstruction and progressive respiratory failure[1, 4].

### Pulmonary exacerbations

Pulmonary pathology is predominantly driven by inflammation, caused by the inability to clear micro-organisms. *CFTR* dysfunction causes impaired mucociliary clearance secondary to reduced hydration of the airway surface liquid. However, multiple other factors likely contribute, including mucus tethering and function, impaired innate immunity and increased intrinsic cellular inflammation[1, 5-7]. CF lung disease is heterogenous, both phenotypically between patients and within individual patients[8]. It is difficult to predict the progression and disease manifestation within an individual[8, 9].

Those affected by cystic fibrosis have recurrent exacerbations of disease. Pulmonary exacerbations are defined symptomatically by increased cough and sputum production and may be associated with respiratory distress, fatigue and reduced exercise tolerance[10, 11]. Investigations including pulmonary function tests, chest imaging, sputum culture and blood inflammatory markers may assist with the clinical decision for treatment initiation and duration[1, 4, 10-12].

## OFFICIAL

## Pulmonary assessment and monitoring

There are multiple methods available to assess pulmonary status in CF, including both functional and structural aspects. There are also developments being made in functional lung imaging, with new imaging modalities able to give visual and quantitative assessments of regional lung ventilation.

### Pulmonary function testing

The most commonly used pulmonary function test in CF is spirometry. Spirometry is a quick, non-invasive way to assess for airway obstruction or restriction. It requires significant respiratory effort and appropriate technique, meaning it is unsuitable for children less than 5-6 years of age. Reduced forced expiratory volume in 1 second (FEV1) is used as the main indicator of airway obstruction, indicating disease progression or pulmonary exacerbation[13, 14]. Body plethysmography can also be used to measure total lung capacity (TLC) and residual volume (RV), which can give an indication of gas trapping associated with airway obstruction. These assessments provide a global assessment of lung function. When there is ventilation inhomogeneity, they cannot identify whether there is potentially a compensated abnormality present[15].

Multiple breath washout (MBW) is another method of assessing pulmonary function. It has the benefit of being able to be performed in a younger age group due to less dependence on technique[16]. The lung clearance index (LCI) is the most commonly utilised outcome and reflects the global ventilation inhomogeneity. It has been shown to be associated with evidence of structural lung disease in patients with CF[17]. However, while it is associated with structural disease, it is not able to identify the location of any abnormality.

### Structural lung assessment

Structural assessment of the lungs in CF is generally performed through chest X-ray, computed tomography (CT) or magnetic resonance imaging (MRI).

Chest X-ray (CXR) is a quick and commonly used imaging technique. It can assess anatomical changes in the lungs and is generally recommended to be performed annually as part of routine CF care[14]. However, it is limited by low resolution and is not sensitive enough to detect early structural lung changes associated with CF.

High Resolution Computed Tomography (HRCT) is the gold standard for identifying structural lung disease in CF[18]. There have been several scoring systems developed for CF lung disease, aimed at identifying evidence of structural damage including bronchiectasis, mucus plugging, bronchial wall thickening and atelectasis. The Perth-Rotterdam Annotated Grid Morphometric Analysis method (PRAGMA-CF) is a scoring system developed by Rosenow, et al, which showed improved correlation between neutrophilic inflammation and CT scores compared to previous methods, as well as stronger relationships between structural changes and trapped air progression[18]. It was also designed to provide reliable quantitative estimates of lung disease in young children, whereas previous methods were predominantly focused on older children and adults. While CT is the gold standard, it is associated with a higher ionising radiation dose than CXR.

MRI of the lung has traditionally been limited, largely due to the technical difficulties produced by low proton density (required for MRI to acquire an appropriate resonance signal) and artefact created by respiratory and cardiac motion[19]. There have been advances in MRI technology to improve lung image quality, with novel MR sequences able to depict some structural changes in CF. However, it is still limited by longer acquisition times and higher expense.

## OFFICIAL

## Functional lung imaging

### *4D computed tomography*

4D computed tomography has a diverse range of methods described in the literature. However, to calculate ventilation metrics they generally undergo three computational steps, including lung volume delineation, measurement of lung motion and algorithmic calculation of surrogate measures for regional ventilation[20, 21]. The most common algorithms are evaluation of lung volume changes using CT intensity or Hounsfield Unit values and deformation vectors[20].

### *Xenon computed tomography*

Xenon is an inert, noble gas. It has been used as an inhalational contrast agent for functional lung imaging due to its x-ray absorption characteristics, being similar to iodine[20, 22]. Xenon CT involves a wash-in phase, where the subject inhales a xenon and oxygen mixture, followed by a period of wash-out, where they inhale a high oxygen concentration while the radioisotope is exhaled or absorbed. Images captured by CT are subsequently processed into three-dimensional distribution maps, where ventilation can be qualitatively and quantitatively assessed[20, 23].

### *Hyperpolarised gas magnetic resonance imaging*

Hyperpolarised gas MRI allows an evaluation of both pulmonary anatomy and function, by the visualisation of dynamic ventilation over the course of a respiratory cycle. The use of noble gas contrast agents, such as helium-3 or xenon-129, allows the circumvention of the traditional lack of proton signal in the lung and better image capture[19, 20, 24]. Ventilation imaging can provide information about defects (including calculation of the ventilation defect percentage, VDP, the percentage of lung with ventilation below 60% of the mean), and diffusion weighted imaging can be utilised to calculate the apparent diffusion coefficient to differentiate between normal and enlarged airspaces[20]. The primary limitations to uptake of hyperpolarised gas MRI is access to expensive hyperpolarising equipment, in addition to an MRI machine and the technical expertise required for testing.

### *X-ray Velocimetry*

X-ray Velocimetry (XV) is a novel form of X-ray imaging that was designed to collect lung ventilation data. The clinical implementation of this technique uses information collected via X-ray fluoroscopy to track the motion of the distinctive speckle pattern that is created by overlapping alveoli within the lung. In the current clinically available assessments in adults, single breath cine-scans using existing fluoroscopic imaging equipment are captured at 5 different angles during tidal breathing. When combined with a thoracic CT, the scans are used to construct a four-dimensional map (i.e. the 3-D volume changes, tracked over time) of regional lung tissue displacement during the breath[25, 26]. This enables creation of a visual map of regional ventilation, derived from the quantitative measures of airflow, and provides metrics such as mean specific ventilation, ventilation heterogeneity (VH) and ventilation defect percentage (VDP)[25].

XV technology has been validated in multiple animal models, including the  $\alpha$ -ENaC mouse model of CF lung disease, in which XV was able to visualise the patchy lung disease and identify regions of reduced airflow[26-28]. The technique has also shown a strong correlation with direct measurements using pneumotachography and plethysmography in a mouse model of bleomycin-induced pulmonary fibrosis[29], and been used to map airflow during high-frequency ventilation[30, 31]. It has since been assessed in early-phase clinical trials in adult human subjects[32]. The first clinical validation was performed in a cohort of patients undergoing radiation therapy for various thoracic cancers, excluding lung cancer[33]. Regional lung ventilation was quantified and compared to spirometry and CT findings at baseline, 4 and 12 months after radiotherapy. Analysis showed

## OFFICIAL

1  
2  
3 correlation between XV ventilation data and both spirometry and CT. XV was also shown to be more  
4 sensitive in measuring alterations in regional lung function over time. Changes detected at 4 months  
5 via XV were not reflected in spirometry metrics at that time point, but became evident at 12 months  
6 post-radiotherapy[33].  
7

8 While XV imaging utilises X-rays, at the current stage of development it also requires a CT of the  
9 chest to provide a structural framework and boundaries for the software. The CT is not required for  
10 assessment of ventilation or parenchymal data. With further development the technique is aimed to  
11 no longer require any CT input and acquire all relevant information from fluoroscopy only.  
12  
13

## 14 Aim

15 The aim of this study is to conduct a single-centre cohort feasibility study in paediatric patients with  
16 CF and in those with normal lungs. Before a statistically powered cohort study is undertaken to  
17 establish both a normative reference range and a CF diagnostic reference range, a feasibility study  
18 was deemed necessary to determine if a properly powered study was possible, and to outline the  
19 optimal design features.  
20  
21  
22

## 23 Methods and analysis

### 24 Study design overview

25 This is a prospective, single-centre, feasibility cohort study. It will recruit children aged 3 to 18 years  
26 (inclusive) to have XV lung imaging performed. The study will recruit children without CF with  
27 healthy/normal lungs, and children with CF. Patients in both cohorts will be required to have had a  
28 CT scan within the last 6 months (or as per clinical judgement) or scheduled to have had a CT scan in  
29 an upcoming appointment as part of their normal clinical care.  
30  
31  
32

33 Patients will be recruited at the Women's and Children's Hospital, North Adelaide, Australia. They  
34 will undergo a clinical assessment with history and physical exam, undertake an XV scan, and  
35 perform at least one of spirometry, plethysmography and diffusing capacity, or multiple breath  
36 washout. Those with CF will also complete the CFQ-R Cystic Fibrosis questionnaire. The CFQ-R will be  
37 applied regularly in a follow-up longitudinal study. Investigators will not be blinded to cohort  
38 allocation.  
39  
40

### 41 Patient and public involvement

42 Patients and public were not involved in the design of this study. Separate to this study, a qualitative  
43 assessment of XV will be undertaken and results used to guide future, larger studies.  
44  
45

### 46 Ethical approval

47 Ethical approval has been granted by The Women's and Children's Hospital Human Research Ethics  
48 Committee. (HREC ID 2021/HRE00396)  
49

50 All participants will provide written consent, either individually or by legal guardian if 16 or older, or  
51 by their legal guardian if younger than 16.  
52  
53

### 54 Study registration

55 The study has retrospective registration with the Australian New Zealand Clinical Trial Registry  
56 (ANZCTR): 1262000109606 and the Universal Trial Number (UTN): U1111-1287-9096.  
57  
58  
59  
60



**OFFICIAL**

## Sample selection

20 patients will be recruited to both the healthy lung (control) and CF cohorts. A sample size of n=20 is within the range recommended for pilot studies to be able to detect adequate effect sizes as would be seen in comparative studies[34, 35].

For each study arm, potential participants will be identified from medical record reports identifying young people aged 3-18 years who may meet our inclusion criteria. Reports of children who have had a CT scan of their chest within the past 3 months will be compiled by hospital administrators or data custodians of individual departments records for assessment by the study team for potential inclusion in the study.

### Arm 1

Arm 1 will include those children with normal lungs. Given children will be required to have a chest CT, specific patient groups have been targeted. These include new-diagnosis oncology patients prior to treatment, physical trauma patients without evidence of lung injury, and rheumatology patients without evidence of pulmonary disease. Other patients identified as potentially suitable will be considered on a case-by-case basis.

### Arm 2

Arm 2 will include those patients with CF. The inclusion and exclusion criteria are the same as for Arm 1, with the exception of the inclusion of a confirmed diagnosis of cystic fibrosis.

### Inclusion criteria

- Aged 3-18 years inclusive at time of consent
- CT scan performed within the last 6 months (or as per clinical judgement), or scheduled to have a CT in an upcoming appointment

### Exclusion criteria

- Pre-existing lung disease in Arm 1, including asthma, interstitial lung disease etc.
- Currently receiving mechanical ventilation, intensive or critical care
- Contraindication to ionising radiation
- Urgent clinical treatment precluding the addition of XV imaging
- Inability to comply and remain still for period of XV image acquisition
- Inability to perform at least one of the pulmonary function tests listed previously.

## Intervention

### Clinical assessment

Patients will undergo a clinical review and physical examination.

### X-ray Velocimetry scan

An XV scan will be performed in The Women's and Children's Hospital Radiology Department. The XV scan involves fluoroscopic imaging of tidal breathing from 5 different angles (AP, +/- 36°, +/- 60°). The images will be sent to 4DMedical, Melbourne, and a report generated via their X-ray Velocimetry Lung Ventilation Analysis Software (XV LVAS) platform. Tissue expansion is calculated to assess ventilation at a regional level within the lung. Ventilation is determined by measuring the change in volume of a specific lung region during inhalation and dividing it by the volume of that same region at the end of exhalation. This calculation generates a unit called specific ventilation (SV), which quantifies volume changes in mm<sup>3</sup> for each individual lung region. Regions that inflate more have higher SV. The SV measurements are presented as a coloured contour image map of the lungs illustrating the spectrum of ventilation measurements during breathing.



## OFFICIAL

XV LVAS report metrics include:

- Tidal Volume (TV) – the volume of air inhaled from start of inspiration to peak inspiration
- Mean Specific Ventilation (MSV) – the mean of specific ventilation across all regions of the lung
- Ventilation Defect Percentage (VDP) – measures the percentage of lung volume that is below 60% of the mean specific ventilation
- Ventilation Heterogeneity (VH) – measures the overall variability of ventilation across the lung

### Pulmonary function testing

Pulmonary function testing will be performed in the Women's and Children's Hospital Lung Laboratory, a nationally accredited pulmonary function testing centre, under the auspices of the Thoracic Society of Australia and New Zealand.

#### *Multiple breath washout*

Eco Medics Exhalysen D equipment will be used to perform nitrogen multiple breath washout testing to generate the Lung Clearance Index.

#### *Spirometry and body plethysmography*

Spirometry and DLCO tests will be performed on a Medisoft Spiro Air, as per ERS/ATS standards[36, 37]. Plethysmography testing will be performed using Medisoft bodybox, also as per ERS/ATS standard[38].

## Outcome measures

### Primary

The primary outcome measure from this feasibility study is to learn how long it will take to recruit 20 children without CF and 20 children with CF to complete an XV scan and the other assessments listed above.

This data will determine if a larger, statistically-powered study can be undertaken at this site to evaluate the diagnostic capabilities of XV imaging, which may be able to better measure lung health compared to existing methods.

### Secondary

Appropriateness of XV LVAS technology as a clinical assessment for lung function, compared to standard and specialised pulmonary lung function techniques

This will be measured by comparisons of XV-LVAS report metrics to report metrics of existing pulmonary function testing, including spirometry, plethysmography and diffusion capacity, and lung clearance index.

Appropriateness of XV LVAS technology as a clinical assessment for structural lung disease, compared to CT imaging

XV LVAS report metrics will be compared to CT chest evidence of structural lung disease, assessed via PRAGMA-CF scoring.

## OFFICIAL

1  
2  
3 Identify which participant characteristics should be considered to clinically evaluate lobar  
4 ventilation distribution, ventilation heterogeneity and expiratory time constant

5 This will be determined through visual inspection of characteristic data and identification of  
6 potential factors that may influence report metrics. Factors will be considered where correlation  
7 trends are observed in continuous and dichotomous variables.  
8  
9

10 Identify if ongoing assessment of ventilation distribution, ventilation heterogeneity and  
11 expiratory time constant is safe and clinically appropriate

12 This will be determined through a retrospective evaluation of CT scan frequency among the young  
13 people with CF, identification of any adverse events during and immediately following XV imaging  
14 and preliminary appropriateness of XV LVAS testing.  
15  
16

### Data analysis

17  
18 The XV, lung function and CT outcome data obtained from this study will be described by group,  
19 using descriptive statistics. Continuous variables will be described using mean and standard  
20 deviation, or median and interquartile range if the distribution is asymmetric. Categorical variables  
21 will be presented as numbers and percentages. Demographic variables age, sex, height and weight  
22 will also be described by group. Statistical association between outcome measures will be assessed  
23 graphically and described using correlation coefficients.  
24  
25  
26

### Data storage

27  
28 All data for an individual participant will be collected by the principal investigator or their delegated  
29 nominees and recorded in the patient record. Participant identification will be through their unique  
30 participant study number. All clinical data will be stored as per SA Health data storage guidelines.  
31  
32

33 Standard clinical lung function data will be collected and stored securely as per WCH guidelines. Each  
34 participant's lung function data will be identified by hospital unique record number (URN) initially,  
35 then de-identified using a numerical code before being sent to statisticians for analysis.  
36  
37

38 Pre-existing radiological data (i.e., CT chest) will continue to be stored as per routine clinical data in  
39 the WCH Radiology Department, using secure WCH server and SA Health computers.  
40

41 De-identified XV LVAS data will be stored in the WCH Respiratory and Sleep Department using the  
42 WCH SA Health Network server. Data will be stored for a minimum of 30 years, according to WCH  
43 data-retention requirements.  
44

45 At the conclusion of the study, all hard copy case report forms, signed consent forms and trial data  
46 will be archived according to the Respiratory Clinical Trial Unit's Archiving SOP at Iron Mountain.  
47  
48

### Adverse events and analysis

49 Lung function testing entails standard procedures that are well established. The testing staff are  
50 trained and experienced in recognising and dealing with potential risks, as a normal part of routine  
51 testing. Some procedures require special breathing efforts. Known risks are:  
52  
53

- 54 - Dizziness
- 55 - Feeling short of breath
- 56 - Coughing
- 57 - Asthma attack precipitated by deep inhalation
- 58
- 59
- 60

## OFFICIAL

1  
2  
3 XV imaging protocol involves exposure to ionising radiation. The radiation dose in the research  
4 portion of the study is low, estimated to between 0.52 – 0.83 mSv, equivalent to between 2-5  
5 standard chest X-rays. As such, there is minimal risk to participants.  
6  
7

## 8 Sponsorship

9 This study is supported by 4DMedical, who will provide the XV LVAS reports for patients undergoing  
10 XV imaging. 4DMedical have no input into study design, outcome analyses, or study conclusions.  
11  
12

## 13 Challenges in study design

14 To allow for appropriate XV LVAS mapping and report, a chest CT is currently required to provide the  
15 anatomical framework. Given the radiation dose required for CT of the chest region, it is not  
16 ethically appropriate to perform a chest CT in children, in addition to that required for routine  
17 clinical care. This is particularly the case in those with healthy lungs where a chest CT assessment is  
18 not clinically indicated. This limits the eligible normal lung patient cohort considerably, given the  
19 relative clinical reluctance to perform CT in children compared to adults. Some potential cohorts of  
20 eligible patients, for example oncology patients, have routine CT. They also, however, frequently  
21 receive agents with known pulmonary side effects. A further limitation is that it will be common to  
22 be unable to perform the additional XV imaging and pulmonary function tests on a child in the  
23 emotionally difficult period between an oncological diagnosis with routine screening CT and  
24 subsequent rapid initiation of treatment.  
25  
26  
27

28 Pulmonary function testing is dependent on compliance and technique. Children less than 5-6 years  
29 of age will be unable to undergo spirometry and plethysmography. In the cohort 5 years and over  
30 there can still be technique issues affecting accurate results. This may affect the ability to compare  
31 XV imaging with standard lung function metrics in some younger children, however this will not  
32 affect the primary study outcome of feasibility.  
33  
34  
35

## 36 Future trial considerations

37 A feasibility study design is necessary to determine if it is possible to recruit and test children  
38 without CF with healthy lungs as well as those with CF to participate in an XV imaging study. This is  
39 an important first step towards establishing a statistically-powered cohort study. Such a study would  
40 evaluate XV LVAS outcomes in children with normal lung function and anatomy that can be used to  
41 provide normal reference range data sets against which putative disease states can be examined.  
42  
43

44 Since XV is a new lung function imaging technology, studies to establish a reference range are a  
45 prerequisite before clinical adoption of the technique for diagnosis and monitoring of children with  
46 lung pathology.  
47  
48

## 49 Article summary

50 This is one of the first studies to investigate XV imaging in a paediatric cohort. Enrolment of  
51 participants is ongoing in 2023 and final results are expected by the end of 2024.  
52  
53

54 Author contributions:

55 MB: Recruitment, draft and review/editing of final manuscript. AT, TG: concept, study design, ethics  
56 submission and approval, recruitment and review/editing of final manuscript. MD: concept, study  
57 design and review/editing of final manuscript. KCC: concept, design and review/editing of final  
58  
59  
60

## OFFICIAL

manuscript. DP: concept, study design, ethics submission and approval, review/editing of final manuscript. JP: recruitment and review/editing of final manuscript.

Acknowledgments:

Nil additional

Conflicts of interest:

DP has received remuneration for research advice from 4DMedical. DP and MD have both purchased shares in 4DMedical Ltd

Funding:

This project is supported by a seed grant from 4DMedical

## References

1. Elborn, J.S., *Cystic fibrosis*. Lancet, 2016. **388**(10059): p. 2519-2531.
2. Ahern, S., et al., *Australian Cystic Fibrosis Data Registry Annual Report 2020*. Monash University Department of Epidemiology and Preventative Medicine, 2021(22).
3. Ong, T. and B.W. Ramsey, *Cystic Fibrosis*. JAMA, 2023. **329**(21): p. 1859.
4. Bell, S.C., et al., *The future of cystic fibrosis care: a global perspective*. Lancet Respir Med, 2020. **8**(1): p. 65-124.
5. Quinton, P.M., *Cystic fibrosis: impaired bicarbonate secretion and mucoviscidosis*. Lancet, 2008. **372**(9636): p. 415-7.
6. Keiser, N.W., et al., *Defective innate immunity and hyperinflammation in newborn cystic fibrosis transmembrane conductance regulator-knockout ferret lungs*. Am J Respir Cell Mol Biol, 2015. **52**(6): p. 683-94.
7. Hoegger, M.J., et al., *Impaired mucus detachment disrupts mucociliary transport in a piglet model of cystic fibrosis*. Science, 2014. **345**(6198): p. 818-22.
8. Vandevanter, D.R., et al., *Cystic fibrosis in young children: A review of disease manifestation, progression, and response to early treatment*. Journal of Cystic Fibrosis, 2016. **15**(2): p. 147-157.
9. Steinke, E., et al., *TRACK-CF prospective cohort study: Understanding early cystic fibrosis lung disease*. Front Med (Lausanne), 2022. **9**: p. 1034290.
10. Goss, C.H., *Acute Pulmonary Exacerbations in Cystic Fibrosis*. Semin Respir Crit Care Med, 2019. **40**(6): p. 792-803.
11. Carter, S.C., et al., *Acute Pulmonary Exacerbation Phenotypes in Patients with Cystic Fibrosis*. Ann Am Thorac Soc, 2022. **19**(11): p. 1818-1826.
12. Goss, C.H., et al., *A Randomized Trial of Antimicrobial Duration for Cystic Fibrosis Pulmonary Exacerbation Treatment*. Am J Respir Crit Care Med, 2021.
13. Stanojevic, S., et al., *Global Lung Function Initiative equations improve interpretation of FEV1 decline among patients with cystic fibrosis*. Eur Respir J, 2015. **46**(1): p. 262-4.
14. Kerem, E., et al., *Standards of care for patients with cystic fibrosis: a European consensus*. J Cyst Fibros, 2005. **4**(1): p. 7-26.
15. Davies, J., et al., *Assessment of clinical response to ivacaftor with lung clearance index in cystic fibrosis patients with a G551D-CFTR mutation and preserved spirometry: a randomised controlled trial*. Lancet Respir Med, 2013. **1**(8): p. 630-638.
16. Robinson, P.D., et al., *Preschool Multiple-Breath Washout Testing. An Official American Thoracic Society Technical Statement*. Am J Respir Crit Care Med, 2018. **197**(5): p. e1-e19.
17. Svedberg, M., et al., *Longitudinal lung clearance index and association with structural lung damage in children with cystic fibrosis*. Thorax, 2023. **78**(2): p. 176-182.

## OFFICIAL

18. Rosenow, T., et al., *PRAGMA-CF. A Quantitative Structural Lung Disease Computed Tomography Outcome in Young Children with Cystic Fibrosis*. Am J Respir Crit Care Med, 2015. **191**(10): p. 1158-65.
19. Dournes, G., et al., *The Clinical Use of Lung MRI in Cystic Fibrosis: What, Now, How?* Chest, 2021. **159**(6): p. 2205-2217.
20. Karmali, D., et al., *Functional imaging for assessing regional lung ventilation in preclinical and clinical research*. Front Med (Lausanne), 2023. **10**: p. 1160292.
21. Jahani, N., et al., *Assessment of regional ventilation and deformation using 4D-CT imaging for healthy human lungs during tidal breathing*. J Appl Physiol (1985), 2015. **119**(10): p. 1064-74.
22. Ohno, Y., et al., *Comparison of Xenon-Enhanced Area-Detector CT and Krypton Ventilation SPECT/CT for Assessment of Pulmonary Functional Loss and Disease Severity in Smokers*. AJR Am J Roentgenol, 2018. **210**(2): p. W45-W53.
23. Kong, X., et al., *Xenon-enhanced dual-energy CT lung ventilation imaging: techniques and clinical applications*. AJR Am J Roentgenol, 2014. **202**(2): p. 309-17.
24. Kolodziej, M., et al., *Lung function imaging methods in Cystic Fibrosis pulmonary disease*. Respir Res, 2017. **18**(1): p. 96.
25. Parsons, D. and M. Donnelley, *Will Airway Gene Therapy for Cystic Fibrosis Improve Lung Function? New Imaging Technologies Can Help Us Find Out*. Hum Gene Ther, 2020. **31**(17-18): p. 973-984.
26. Murrie, R.P., et al., *Real-time in vivo imaging of regional lung function in a mouse model of cystic fibrosis on a laboratory X-ray source*. Sci Rep, 2020. **10**(1): p. 447.
27. Werdiger, F., et al., *Quantification of muco-obstructive lung disease variability in mice via laboratory X-ray velocimetry*. Scientific Reports, 2020. **10**(1).
28. Stahr, C.S., et al., *Quantification of heterogeneity in lung disease with image-based pulmonary function testing*. Scientific Reports, 2016. **6**(1): p. 29438.
29. Fouras, A., et al., *Altered lung motion is a sensitive indicator of regional lung disease*. Ann Biomed Eng, 2012. **40**(5): p. 1160-9.
30. Thurgood, J., et al., *Functional lung imaging during HFV in preterm rabbits*. PLoS One, 2012. **7**(10): p. e48122.
31. Kitchen, M.J., et al., *Dynamic measures of regional lung air volume using phase contrast x-ray imaging*. Phys Med Biol, 2008. **53**(21): p. 6065-77.
32. Kirkness, J.P., et al., *Association of x-ray velocimetry (XV) ventilation analysis compared to spirometry*. Front Med Technol, 2023. **5**: p. 1148310.
33. Dusting, J.S., O. Wenger, D. Doshi, C. De Marco, J. Martin, C. et al, *First-in-human validation of x-ray velocimetry demonstrates superior sensitivity over spirometry and CT for quantification of regional lung function [abstract]*. Chest, 2020. **158**: p. A1393-4.
34. Whitehead, A.L., et al., *Estimating the sample size for a pilot randomised trial to minimise the overall trial sample size for the external pilot and main trial for a continuous outcome variable*. Statistical Methods in Medical Research, 2016. **25**(3): p. 1057-1073.
35. Bell, M.L., *New guidance to improve sample size calculations for trials: eliciting the target difference*. Trials, 2018. **19**(1).
36. Graham, B.L., et al., *Standardization of Spirometry 2019 Update. An Official American Thoracic Society and European Respiratory Society Technical Statement*. Am J Respir Crit Care Med, 2019. **200**(8): p. e70-e88.
37. Graham, B.L., et al., *2017 ERS/ATS standards for single-breath carbon monoxide uptake in the lung*. Eur Respir J, 2017. **49**(1).
38. Wanger, J., et al., *Standardisation of the measurement of lung volumes*. Eur Respir J, 2005. **26**(3): p. 511-22.

## OFFICIAL

# Reporting checklist for protocol of a clinical trial.

Based on the SPIRIT guidelines.

## Instructions to authors

Complete this checklist by entering the page numbers from your manuscript where readers will find each of the items listed below.

Your article may not currently address all the items on the checklist. Please modify your text to include the missing information. If you are certain that an item does not apply, please write "n/a" and provide a short explanation.

Upload your completed checklist as an extra file when you submit to a journal.

In your methods section, say that you used the SPIRIT reporting guidelines, and cite them as:

Chan A-W, Tetzlaff JM, Gøtzsche PC, Altman DG, Mann H, Berlin J, Dickersin K, Hróbjartsson A, Schulz KF, Parulekar WR, Krleža-Jerić K, Laupacis A, Moher D. SPIRIT 2013 Explanation and Elaboration: Guidance for protocols of clinical trials. *BMJ*. 2013;346:e7586

|                                   |                                                                                                                                 | Page   |
|-----------------------------------|---------------------------------------------------------------------------------------------------------------------------------|--------|
|                                   | Reporting Item                                                                                                                  | Number |
| <b>Administrative information</b> |                                                                                                                                 |        |
| Title                             | <a href="#">#1</a> Descriptive title identifying the study design, population, interventions, and, if applicable, trial acronym | 1      |



|    |                     |                     |                                                            |     |
|----|---------------------|---------------------|------------------------------------------------------------|-----|
| 1  | Trial registration  | <a href="#">#2a</a> | Trial identifier and registry name. If not yet registered, | 5   |
| 2  |                     |                     | name of intended registry                                  |     |
| 3  |                     |                     |                                                            |     |
| 4  |                     |                     |                                                            |     |
| 5  |                     |                     |                                                            |     |
| 6  | Trial registration: | <a href="#">#2b</a> | All items from the World Health Organization Trial         | 5   |
| 7  |                     |                     |                                                            |     |
| 8  | data set            |                     | Registration Data Set                                      |     |
| 9  |                     |                     |                                                            |     |
| 10 |                     |                     |                                                            |     |
| 11 |                     |                     |                                                            |     |
| 12 | Protocol version    | <a href="#">#3</a>  | Date and version identifier                                | 1   |
| 13 |                     |                     |                                                            |     |
| 14 |                     |                     |                                                            |     |
| 15 | Funding             | <a href="#">#4</a>  | Sources and types of financial, material, and other        | 9   |
| 16 |                     |                     | support                                                    |     |
| 17 |                     |                     |                                                            |     |
| 18 |                     |                     |                                                            |     |
| 19 |                     |                     |                                                            |     |
| 20 | Roles and           | <a href="#">#5a</a> | Names, affiliations, and roles of protocol contributors    | 9   |
| 21 |                     |                     |                                                            |     |
| 22 | responsibilities:   |                     |                                                            |     |
| 23 |                     |                     |                                                            |     |
| 24 | contributorship     |                     |                                                            |     |
| 25 |                     |                     |                                                            |     |
| 26 |                     |                     |                                                            |     |
| 27 |                     |                     |                                                            |     |
| 28 | Roles and           | <a href="#">#5b</a> | Name and contact information for the trial sponsor         | n/a |
| 29 |                     |                     |                                                            |     |
| 30 | responsibilities:   |                     |                                                            |     |
| 31 |                     |                     |                                                            |     |
| 32 | sponsor contact     |                     |                                                            |     |
| 33 |                     |                     |                                                            |     |
| 34 | information         |                     |                                                            |     |
| 35 |                     |                     |                                                            |     |
| 36 |                     |                     |                                                            |     |
| 37 |                     |                     |                                                            |     |
| 38 | Roles and           | <a href="#">#5c</a> | Role of study sponsor and funders, if any, in study        | n/a |
| 39 |                     |                     |                                                            |     |
| 40 | responsibilities:   |                     | design; collection, management, analysis, and              |     |
| 41 |                     |                     | interpretation of data; writing of the report; and the     |     |
| 42 | sponsor and funder  |                     | decision to submit the report for publication, including   |     |
| 43 |                     |                     | whether they will have ultimate authority over any of      |     |
| 44 |                     |                     | these activities                                           |     |
| 45 |                     |                     |                                                            |     |
| 46 |                     |                     |                                                            |     |
| 47 |                     |                     |                                                            |     |
| 48 |                     |                     |                                                            |     |
| 49 |                     |                     |                                                            |     |
| 50 |                     |                     |                                                            |     |
| 51 |                     |                     |                                                            |     |
| 52 |                     |                     |                                                            |     |
| 53 |                     |                     |                                                            |     |
| 54 |                     |                     |                                                            |     |
| 55 |                     |                     |                                                            |     |
| 56 |                     |                     |                                                            |     |
| 57 |                     |                     |                                                            |     |
| 58 |                     |                     |                                                            |     |
| 59 |                     |                     |                                                            |     |
| 60 |                     |                     |                                                            |     |



1 Roles and [#5d](#) Composition, roles, and responsibilities of the n/a  
 2  
 3 responsibilities:  
 4 coordinating centre, steering committee, endpoint  
 5 committees  
 6 adjudication committee, data management team, and  
 7  
 8 other individuals or groups overseeing the trial, if  
 9  
 10 applicable (see Item 21a for data monitoring committee)  
 11  
 12

## 13 Introduction

14  
 15  
 16 Background and [#6a](#) Description of research question and justification for 1-3  
 17 rationale  
 18 undertaking the trial, including summary of relevant  
 19 studies (published and unpublished) examining benefits  
 20 and harms for each intervention  
 21  
 22  
 23  
 24

25  
 26 Background and [#6b](#) Explanation for choice of comparators 1-3  
 27 rationale: choice of  
 28 comparators  
 29  
 30  
 31  
 32  
 33

34 Objectives [#7](#) Specific objectives or hypotheses 4  
 35  
 36

37 Trial design [#8](#) Description of trial design including type of trial (eg, 5  
 38 parallel group, crossover, factorial, single group),  
 39 allocation ratio, and framework (eg, superiority,  
 40 equivalence, non-inferiority, exploratory)  
 41  
 42  
 43  
 44  
 45  
 46

## 47 Methods:

48  
 49 Participants,  
 50  
 51 interventions, and  
 52  
 53 outcomes  
 54  
 55  
 56  
 57  
 58  
 59  
 60

|    |                      |                      |                                                              |     |
|----|----------------------|----------------------|--------------------------------------------------------------|-----|
| 1  | Study setting        | <a href="#">#9</a>   | Description of study settings (eg, community clinic,         | 5   |
| 2  |                      |                      | academic hospital) and list of countries where data will be  |     |
| 3  |                      |                      | collected. Reference to where list of study sites can be     |     |
| 4  |                      |                      | obtained                                                     |     |
| 5  |                      |                      |                                                              |     |
| 6  |                      |                      |                                                              |     |
| 7  |                      |                      |                                                              |     |
| 8  |                      |                      |                                                              |     |
| 9  |                      |                      |                                                              |     |
| 10 |                      |                      |                                                              |     |
| 11 | Eligibility criteria | <a href="#">#10</a>  | Inclusion and exclusion criteria for participants. If        | 5-6 |
| 12 |                      |                      | applicable, eligibility criteria for study centres and       |     |
| 13 |                      |                      | individuals who will perform the interventions (eg,          |     |
| 14 |                      |                      | surgeons, psychotherapists)                                  |     |
| 15 |                      |                      |                                                              |     |
| 16 |                      |                      |                                                              |     |
| 17 |                      |                      |                                                              |     |
| 18 |                      |                      |                                                              |     |
| 19 |                      |                      |                                                              |     |
| 20 |                      |                      |                                                              |     |
| 21 | Interventions:       | <a href="#">#11a</a> | Interventions for each group with sufficient detail to allow | 6   |
| 22 |                      |                      | replication, including how and when they will be             |     |
| 23 | description          |                      | administered                                                 |     |
| 24 |                      |                      |                                                              |     |
| 25 |                      |                      |                                                              |     |
| 26 |                      |                      |                                                              |     |
| 27 |                      |                      |                                                              |     |
| 28 |                      |                      |                                                              |     |
| 29 | Interventions:       | <a href="#">#11b</a> | Criteria for discontinuing or modifying allocated            | n/a |
| 30 |                      |                      | interventions for a given trial participant (eg, drug dose   |     |
| 31 | modifications        |                      | change in response to harms, participant request, or         |     |
| 32 |                      |                      | improving / worsening disease)                               |     |
| 33 |                      |                      |                                                              |     |
| 34 |                      |                      |                                                              |     |
| 35 |                      |                      |                                                              |     |
| 36 |                      |                      |                                                              |     |
| 37 |                      |                      |                                                              |     |
| 38 |                      |                      |                                                              |     |
| 39 | Interventions:       | <a href="#">#11c</a> | Strategies to improve adherence to intervention protocols,   | n/a |
| 40 |                      |                      | and any procedures for monitoring adherence (eg, drug        |     |
| 41 | adherence            |                      | tablet return; laboratory tests)                             |     |
| 42 |                      |                      |                                                              |     |
| 43 |                      |                      |                                                              |     |
| 44 |                      |                      |                                                              |     |
| 45 |                      |                      |                                                              |     |
| 46 | Interventions:       | <a href="#">#11d</a> | Relevant concomitant care and interventions that are         | n/a |
| 47 |                      |                      | permitted or prohibited during the trial                     |     |
| 48 | concomitant care     |                      |                                                              |     |
| 49 |                      |                      |                                                              |     |
| 50 |                      |                      |                                                              |     |
| 51 | Outcomes             | <a href="#">#12</a>  | Primary, secondary, and other outcomes, including the        | 7   |
| 52 |                      |                      | specific measurement variable (eg, systolic blood            |     |
| 53 |                      |                      | pressure), analysis metric (eg, change from baseline, final  |     |
| 54 |                      |                      |                                                              |     |
| 55 |                      |                      |                                                              |     |
| 56 |                      |                      |                                                              |     |
| 57 |                      |                      |                                                              |     |
| 58 |                      |                      |                                                              |     |
| 59 |                      |                      |                                                              |     |
| 60 |                      |                      |                                                              |     |

value, time to event), method of aggregation (eg, median, proportion), and time point for each outcome. Explanation of the clinical relevance of chosen efficacy and harm outcomes is strongly recommended

|                                                                                                       |                                                                               |                      |                                                                                                                                                                                                                                                                                   |     |
|-------------------------------------------------------------------------------------------------------|-------------------------------------------------------------------------------|----------------------|-----------------------------------------------------------------------------------------------------------------------------------------------------------------------------------------------------------------------------------------------------------------------------------|-----|
| 1<br>2<br>3<br>4<br>5<br>6<br>7<br>8<br>9<br>10<br>11<br>12<br>13<br>14<br>15<br>16<br>17<br>18<br>19 | Participant timeline                                                          | <a href="#">#13</a>  | Time schedule of enrolment, interventions (including any run-ins and washouts), assessments, and visits for participants. A schematic diagram is highly recommended (see Figure)                                                                                                  | 7   |
| 20<br>21<br>22<br>23<br>24<br>25<br>26<br>27<br>28<br>29                                              | Sample size                                                                   | <a href="#">#14</a>  | Estimated number of participants needed to achieve study objectives and how it was determined, including clinical and statistical assumptions supporting any sample size calculations                                                                                             | 7   |
| 30<br>31<br>32<br>33<br>34                                                                            | Recruitment                                                                   | <a href="#">#15</a>  | Strategies for achieving adequate participant enrolment to reach target sample size                                                                                                                                                                                               | 5   |
| 35<br>36<br>37<br>38<br>39<br>40<br>41<br>42<br>43<br>44                                              | <b>Methods:</b><br><b>Assignment of interventions (for controlled trials)</b> |                      |                                                                                                                                                                                                                                                                                   |     |
| 45<br>46<br>47<br>48<br>49<br>50<br>51<br>52<br>53<br>54<br>55<br>56<br>57<br>58<br>59<br>60          | Allocation: sequence generation                                               | <a href="#">#16a</a> | Method of generating the allocation sequence (eg, computer-generated random numbers), and list of any factors for stratification. To reduce predictability of a random sequence, details of any planned restriction (eg, blocking) should be provided in a separate document that | n/a |

|    |                      |                                                                                 |     |
|----|----------------------|---------------------------------------------------------------------------------|-----|
| 1  |                      | is unavailable to those who enrol participants or assign                        |     |
| 2  |                      |                                                                                 |     |
| 3  |                      | interventions                                                                   |     |
| 4  |                      |                                                                                 |     |
| 5  |                      |                                                                                 |     |
| 6  | Allocation           | <a href="#">#16b</a> Mechanism of implementing the allocation sequence (eg,     | n/a |
| 7  |                      |                                                                                 |     |
| 8  | concealment          | central telephone; sequentially numbered, opaque,                               |     |
| 9  |                      |                                                                                 |     |
| 10 | mechanism            | sealed envelopes), describing any steps to conceal the                          |     |
| 11 |                      |                                                                                 |     |
| 12 |                      | sequence until interventions are assigned                                       |     |
| 13 |                      |                                                                                 |     |
| 14 |                      |                                                                                 |     |
| 15 |                      |                                                                                 |     |
| 16 | Allocation:          | <a href="#">#16c</a> Who will generate the allocation sequence, who will enrol  | n/a |
| 17 |                      |                                                                                 |     |
| 18 | implementation       | participants, and who will assign participants to                               |     |
| 19 |                      |                                                                                 |     |
| 20 |                      | interventions                                                                   |     |
| 21 |                      |                                                                                 |     |
| 22 |                      |                                                                                 |     |
| 23 | Blinding (masking)   | <a href="#">#17a</a> Who will be blinded after assignment to interventions (eg, | n/a |
| 24 |                      |                                                                                 |     |
| 25 |                      | trial participants, care providers, outcome assessors, data                     |     |
| 26 |                      |                                                                                 |     |
| 27 |                      | analysts), and how                                                              |     |
| 28 |                      |                                                                                 |     |
| 29 |                      |                                                                                 |     |
| 30 |                      |                                                                                 |     |
| 31 | Blinding (masking):  | <a href="#">#17b</a> If blinded, circumstances under which unblinding is        | n/a |
| 32 |                      |                                                                                 |     |
| 33 | emergency            | permissible, and procedure for revealing a participant's                        |     |
| 34 |                      |                                                                                 |     |
| 35 | unblinding           | allocated intervention during the trial                                         |     |
| 36 |                      |                                                                                 |     |
| 37 |                      |                                                                                 |     |
| 38 |                      |                                                                                 |     |
| 39 | <b>Methods: Data</b> |                                                                                 |     |
| 40 |                      |                                                                                 |     |
| 41 | collection,          |                                                                                 |     |
| 42 |                      |                                                                                 |     |
| 43 | management, and      |                                                                                 |     |
| 44 |                      |                                                                                 |     |
| 45 | analysis             |                                                                                 |     |
| 46 |                      |                                                                                 |     |
| 47 |                      |                                                                                 |     |
| 48 | Data collection plan | <a href="#">#18a</a> Plans for assessment and collection of outcome,            | 7   |
| 49 |                      |                                                                                 |     |
| 50 |                      | baseline, and other trial data, including any related                           |     |
| 51 |                      |                                                                                 |     |
| 52 |                      | processes to promote data quality (eg, duplicate                                |     |
| 53 |                      |                                                                                 |     |
| 54 |                      | measurements, training of assessors) and a description                          |     |
| 55 |                      |                                                                                 |     |
| 56 |                      |                                                                                 |     |
| 57 |                      |                                                                                 |     |
| 58 |                      |                                                                                 |     |
| 59 |                      |                                                                                 |     |
| 60 |                      |                                                                                 |     |

of study instruments (eg, questionnaires, laboratory tests) along with their reliability and validity, if known. Reference to where data collection forms can be found, if not in the protocol

|                                                                                                       |                                                  |                                                                                                                                                                                                                                                                                       |     |
|-------------------------------------------------------------------------------------------------------|--------------------------------------------------|---------------------------------------------------------------------------------------------------------------------------------------------------------------------------------------------------------------------------------------------------------------------------------------|-----|
| 1<br>2<br>3<br>4<br>5<br>6<br>7<br>8<br>9<br>10<br>11<br>12<br>13<br>14<br>15<br>16<br>17<br>18<br>19 | Data collection plan: retention                  | <a href="#">#18b</a> Plans to promote participant retention and complete follow-up, including list of any outcome data to be collected for participants who discontinue or deviate from intervention protocols                                                                        | 7-8 |
| 20<br>21<br>22<br>23<br>24<br>25<br>26<br>27<br>28<br>29<br>30<br>31                                  | Data management                                  | <a href="#">#19</a> Plans for data entry, coding, security, and storage, including any related processes to promote data quality (eg, double data entry; range checks for data values). Reference to where details of data management procedures can be found, if not in the protocol | 7-8 |
| 32<br>33<br>34<br>35<br>36<br>37<br>38<br>39                                                          | Statistics: outcomes                             | <a href="#">#20a</a> Statistical methods for analysing primary and secondary outcomes. Reference to where other details of the statistical analysis plan can be found, if not in the protocol                                                                                         | 7   |
| 40<br>41<br>42<br>43<br>44                                                                            | Statistics: additional analyses                  | <a href="#">#20b</a> Methods for any additional analyses (eg, subgroup and adjusted analyses)                                                                                                                                                                                         | 7   |
| 45<br>46<br>47<br>48<br>49<br>50<br>51<br>52<br>53<br>54                                              | Statistics: analysis population and missing data | <a href="#">#20c</a> Definition of analysis population relating to protocol non-adherence (eg, as randomised analysis), and any statistical methods to handle missing data (eg, multiple imputation)                                                                                  | n/a |

## Methods: Monitoring

|    |                      |                      |                                                             |     |
|----|----------------------|----------------------|-------------------------------------------------------------|-----|
| 1  | Data monitoring:     | <a href="#">#21a</a> | Composition of data monitoring committee (DMC);             | n/a |
| 2  |                      |                      |                                                             |     |
| 3  | formal committee     |                      | summary of its role and reporting structure; statement of   |     |
| 4  |                      |                      | whether it is independent from the sponsor and              |     |
| 5  |                      |                      | competing interests; and reference to where further         |     |
| 6  |                      |                      | details about its charter can be found, if not in the       |     |
| 7  |                      |                      | protocol. Alternatively, an explanation of why a DMC is     |     |
| 8  |                      |                      | not needed                                                  |     |
| 9  |                      |                      |                                                             |     |
| 10 | Data monitoring:     | <a href="#">#21b</a> | Description of any interim analyses and stopping            | n/a |
| 11 |                      |                      |                                                             |     |
| 12 | interim analysis     |                      | guidelines, including who will have access to these         |     |
| 13 |                      |                      | interim results and make the final decision to terminate    |     |
| 14 |                      |                      | the trial                                                   |     |
| 15 |                      |                      |                                                             |     |
| 16 | Harms                | <a href="#">#22</a>  | Plans for collecting, assessing, reporting, and managing    | 8   |
| 17 |                      |                      | solicited and spontaneously reported adverse events and     |     |
| 18 |                      |                      | other unintended effects of trial interventions or trial    |     |
| 19 |                      |                      | conduct                                                     |     |
| 20 |                      |                      |                                                             |     |
| 21 | Auditing             | <a href="#">#23</a>  | Frequency and procedures for auditing trial conduct, if     | 5   |
| 22 |                      |                      | any, and whether the process will be independent from       |     |
| 23 |                      |                      | investigators and the sponsor                               |     |
| 24 |                      |                      |                                                             |     |
| 25 | <b>Ethics and</b>    |                      |                                                             |     |
| 26 | <b>dissemination</b> |                      |                                                             |     |
| 27 |                      |                      |                                                             |     |
| 28 | Research ethics      | <a href="#">#24</a>  | Plans for seeking research ethics committee / institutional | 5   |
| 29 |                      |                      |                                                             |     |
| 30 | approval             |                      | review board (REC / IRB) approval                           |     |
| 31 |                      |                      |                                                             |     |
| 32 |                      |                      |                                                             |     |
| 33 |                      |                      |                                                             |     |
| 34 |                      |                      |                                                             |     |
| 35 |                      |                      |                                                             |     |
| 36 |                      |                      |                                                             |     |
| 37 |                      |                      |                                                             |     |
| 38 |                      |                      |                                                             |     |
| 39 |                      |                      |                                                             |     |
| 40 |                      |                      |                                                             |     |
| 41 |                      |                      |                                                             |     |
| 42 |                      |                      |                                                             |     |
| 43 |                      |                      |                                                             |     |
| 44 |                      |                      |                                                             |     |
| 45 |                      |                      |                                                             |     |
| 46 |                      |                      |                                                             |     |
| 47 |                      |                      |                                                             |     |
| 48 |                      |                      |                                                             |     |
| 49 |                      |                      |                                                             |     |
| 50 |                      |                      |                                                             |     |
| 51 |                      |                      |                                                             |     |
| 52 |                      |                      |                                                             |     |
| 53 |                      |                      |                                                             |     |
| 54 |                      |                      |                                                             |     |
| 55 |                      |                      |                                                             |     |
| 56 |                      |                      |                                                             |     |
| 57 |                      |                      |                                                             |     |
| 58 |                      |                      |                                                             |     |
| 59 |                      |                      |                                                             |     |
| 60 |                      |                      |                                                             |     |

|    |                    |                      |                                                                |   |
|----|--------------------|----------------------|----------------------------------------------------------------|---|
| 1  | Protocol           | <a href="#">#25</a>  | Plans for communicating important protocol modifications       | 5 |
| 2  |                    |                      |                                                                |   |
| 3  | amendments         |                      | (eg, changes to eligibility criteria, outcomes, analyses) to   |   |
| 4  |                    |                      | relevant parties (eg, investigators, REC / IRBs, trial         |   |
| 5  |                    |                      | participants, trial registries, journals, regulators)          |   |
| 6  |                    |                      |                                                                |   |
| 7  |                    |                      |                                                                |   |
| 8  |                    |                      |                                                                |   |
| 9  |                    |                      |                                                                |   |
| 10 |                    |                      |                                                                |   |
| 11 | Consent or assent  | <a href="#">#26a</a> | Who will obtain informed consent or assent from potential      | 5 |
| 12 |                    |                      | trial participants or authorised surrogates, and how (see      |   |
| 13 |                    |                      | Item 32)                                                       |   |
| 14 |                    |                      |                                                                |   |
| 15 |                    |                      |                                                                |   |
| 16 |                    |                      |                                                                |   |
| 17 |                    |                      |                                                                |   |
| 18 |                    |                      |                                                                |   |
| 19 | Consent or assent: | <a href="#">#26b</a> | Additional consent provisions for collection and use of        | 5 |
| 20 | ancillary studies  |                      | participant data and biological specimens in ancillary         |   |
| 21 |                    |                      | studies, if applicable                                         |   |
| 22 |                    |                      |                                                                |   |
| 23 |                    |                      |                                                                |   |
| 24 |                    |                      |                                                                |   |
| 25 |                    |                      |                                                                |   |
| 26 | Confidentiality    | <a href="#">#27</a>  | How personal information about potential and enrolled          | 7 |
| 27 |                    |                      | participants will be collected, shared, and maintained in      |   |
| 28 |                    |                      | order to protect confidentiality before, during, and after     |   |
| 29 |                    |                      | the trial                                                      |   |
| 30 |                    |                      |                                                                |   |
| 31 |                    |                      |                                                                |   |
| 32 |                    |                      |                                                                |   |
| 33 |                    |                      |                                                                |   |
| 34 |                    |                      |                                                                |   |
| 35 |                    |                      |                                                                |   |
| 36 | Declaration of     | <a href="#">#28</a>  | Financial and other competing interests for principal          | 9 |
| 37 | interests          |                      | investigators for the overall trial and each study site        |   |
| 38 |                    |                      |                                                                |   |
| 39 |                    |                      |                                                                |   |
| 40 |                    |                      |                                                                |   |
| 41 |                    |                      |                                                                |   |
| 42 | Data access        | <a href="#">#29</a>  | Statement of who will have access to the final trial           | 8 |
| 43 |                    |                      | dataset, and disclosure of contractual agreements that         |   |
| 44 |                    |                      | limit such access for investigators                            |   |
| 45 |                    |                      |                                                                |   |
| 46 |                    |                      |                                                                |   |
| 47 |                    |                      |                                                                |   |
| 48 |                    |                      |                                                                |   |
| 49 | Ancillary and post | <a href="#">#30</a>  | Provisions, if any, for ancillary and post-trial care, and for | 8 |
| 50 | trial care         |                      | compensation to those who suffer harm from trial               |   |
| 51 |                    |                      | participation                                                  |   |
| 52 |                    |                      |                                                                |   |
| 53 |                    |                      |                                                                |   |
| 54 |                    |                      |                                                                |   |
| 55 |                    |                      |                                                                |   |
| 56 |                    |                      |                                                                |   |
| 57 |                    |                      |                                                                |   |
| 58 |                    |                      |                                                                |   |
| 59 |                    |                      |                                                                |   |
| 60 |                    |                      |                                                                |   |



|    |                       |                      |                                                               |     |
|----|-----------------------|----------------------|---------------------------------------------------------------|-----|
| 1  | Dissemination policy: | <a href="#">#31a</a> | Plans for investigators and sponsor to communicate trial      | 1   |
| 2  |                       |                      |                                                               |     |
| 3  | trial results         |                      | results to participants, healthcare professionals, the        |     |
| 4  |                       |                      | public, and other relevant groups (eg, via publication,       |     |
| 5  |                       |                      | reporting in results databases, or other data sharing         |     |
| 6  |                       |                      | arrangements), including any publication restrictions         |     |
| 7  |                       |                      |                                                               |     |
| 8  | Dissemination policy: | <a href="#">#31b</a> | Authorship eligibility guidelines and any intended use of     | 1   |
| 9  |                       |                      |                                                               |     |
| 10 | authorship            |                      | professional writers                                          |     |
| 11 |                       |                      |                                                               |     |
| 12 | Dissemination policy: | <a href="#">#31c</a> | Plans, if any, for granting public access to the full         | 8   |
| 13 |                       |                      |                                                               |     |
| 14 | reproducible          |                      | protocol, participant-level dataset, and statistical code     |     |
| 15 |                       |                      |                                                               |     |
| 16 | research              |                      |                                                               |     |
| 17 |                       |                      |                                                               |     |
| 18 | <b>Appendices</b>     |                      |                                                               |     |
| 19 |                       |                      |                                                               |     |
| 20 | Informed consent      | <a href="#">#32</a>  | Model consent form and other related documentation            | 7   |
| 21 |                       |                      |                                                               |     |
| 22 | materials             |                      | given to participants and authorised surrogates               |     |
| 23 |                       |                      |                                                               |     |
| 24 | Biological specimens  | <a href="#">#33</a>  | Plans for collection, laboratory evaluation, and storage of   | n/a |
| 25 |                       |                      |                                                               |     |
| 26 |                       |                      | biological specimens for genetic or molecular analysis in     |     |
| 27 |                       |                      | the current trial and for future use in ancillary studies, if |     |
| 28 |                       |                      | applicable                                                    |     |
| 29 |                       |                      |                                                               |     |

30 The SPIRIT Explanation and Elaboration paper is distributed under the terms of the Creative  
31 Commons Attribution License CC-BY-NC. This checklist was completed on 18. September 2023  
32 using <https://www.goodreports.org/>, a tool made by the [EQUATOR Network](#) in collaboration with  
33 [Penelope.ai](#)  
34  
35  
36  
37  
38  
39  
40  
41  
42  
43  
44

# BMJ Open

## Protocol: Pilot study of paediatric regional lung function assessment via X-ray Velocimetry (XV) imaging in children with normal lungs and in children with cystic fibrosis

|                                 |                                                                                                                                                                                                                                                                                                                                                                                                                                                                                                                                                                                                                                                                                           |
|---------------------------------|-------------------------------------------------------------------------------------------------------------------------------------------------------------------------------------------------------------------------------------------------------------------------------------------------------------------------------------------------------------------------------------------------------------------------------------------------------------------------------------------------------------------------------------------------------------------------------------------------------------------------------------------------------------------------------------------|
| Journal:                        | <i>BMJ Open</i>                                                                                                                                                                                                                                                                                                                                                                                                                                                                                                                                                                                                                                                                           |
| Manuscript ID                   | bmjopen-2023-080034.R1                                                                                                                                                                                                                                                                                                                                                                                                                                                                                                                                                                                                                                                                    |
| Article Type:                   | Protocol                                                                                                                                                                                                                                                                                                                                                                                                                                                                                                                                                                                                                                                                                  |
| Date Submitted by the Author:   | 19-Dec-2023                                                                                                                                                                                                                                                                                                                                                                                                                                                                                                                                                                                                                                                                               |
| Complete List of Authors:       | Bruorton, Matthew; The University of Adelaide; Women's and Children's Health Network<br>Donnelley, Martin; The University of Adelaide; The University of Adelaide<br>Goddard, Thomas; The University of Adelaide; Women's and Children's Health Network<br>O'Connor, Antonia; Sydney Children's Hospitals Network, Sleep Department; University of New South Wales<br>Parsons, David; The University of Adelaide; Women's and Children's Health Network<br>Phillips, Jessica; Women's and Children's Health Network; The University of Adelaide<br>Carson-Chahhoud, Kristin; The University of Adelaide<br>Tai, Andrew; The University of Adelaide; Women's and Children's Health Network |
| <b>Primary Subject Heading</b>: | Paediatrics                                                                                                                                                                                                                                                                                                                                                                                                                                                                                                                                                                                                                                                                               |
| Secondary Subject Heading:      | Radiology and imaging, Respiratory medicine                                                                                                                                                                                                                                                                                                                                                                                                                                                                                                                                                                                                                                               |
| Keywords:                       | Cystic fibrosis < THORACIC MEDICINE, Paediatric radiology < RADIOLOGY & IMAGING, Respiratory Function Test, Chest imaging < RADIOLOGY & IMAGING                                                                                                                                                                                                                                                                                                                                                                                                                                                                                                                                           |
|                                 |                                                                                                                                                                                                                                                                                                                                                                                                                                                                                                                                                                                                                                                                                           |

SCHOLARONE™  
Manuscripts

OFFICIAL

# Protocol: Pilot study of paediatric regional lung function assessment via X-ray Velocimetry (XV) imaging in children with normal lungs and in children with cystic fibrosis

Authors:

Matthew Bruorton<sup>1,2</sup>, Kristin Carson-Chahhoud<sup>1,3,4</sup>, Martin Donnelley<sup>1,5</sup>, Thomas Goddard<sup>1,2</sup>, Antonia O'Connor<sup>6,7</sup>, David Parsons<sup>1,2,5</sup>, Jessica Phillips<sup>2,5</sup> and Andrew Tai<sup>1,2,5</sup>

Corresponding author:

Matthew Bruorton – matthew.bruorton@adelaide.edu.au

Affiliations:

- 1- Adelaide Medical School, The University of Adelaide, Adelaide, SA, Australia
- 2- Respiratory and Sleep Medicine, Women's and Children's Hospital, North Adelaide, SA, Australia
- 3- Translational Medicine and Technology Group, Australian Centre for Precision Health, University of South Australia, Adelaide, Australia
- 4- South Australian Health and Medical Research Institute, Adelaide, Australia
- 5- Robinson Research Institute, The University of Adelaide, Adelaide, SA, Australia
- 6- Sleep Department, Sydney Children's Hospital, Randwick, NSW, Australia
- 7- Faculty of Medicine and Health, University of New South Wales, Sydney, NSW, Australia

Abstract:

**Introduction:** Cystic fibrosis (CF) is a life-limiting autosomal recessive genetic condition. It is caused by mutations in the gene that encodes for a chloride and bicarbonate conducting transmembrane channel. X-ray Velocimetry (XV) is a novel form of X-ray imaging that can generate lung ventilation data through the breathing cycle. XV technology has been validated in multiple animal models, including the  $\beta$ -ENaC mouse model of cystic fibrosis lung disease. It has since been assessed in early-phase clinical trials in adult human subjects, however there is a paucity of data in the paediatric cohort, including in CF. The aim of this pilot study is to investigate the feasibility of performing a single-centre cohort study in paediatric patients with CF and in those with normal lungs, to demonstrate the appropriateness of proceeding with further studies of XV in these cohorts.

**Methods and analysis:** This is a cross-sectional, single-centre, pilot study. It will recruit children aged 3 to 18 years to have XV lung imaging performed, as well as paired pulmonary function testing. The study will aim to recruit 20 children without cystic fibrosis with normal lungs, and 20 children with cystic fibrosis. The primary outcome will be the feasibility of recruiting children and performing XV testing. Secondary outcomes will include comparisons between XV and current assessments of pulmonary function and structure.

**Ethics and dissemination:** This project has ethical approval granted by The Women's and Children's Hospital Human Research Ethics Committee. (HREC ID 2021/HRE00396). Findings will be disseminated through peer-reviewed publication and conferences.

Trial registration number (ACTRN12623000109606)

OFFICIAL

## OFFICIAL

## Strengths and limitations of this study

- As a pilot study the sample size is small, and the aim and design is well suited to assessment of the feasibility of future XV studies in paediatrics and cystic fibrosis.
- The cohorts targeted for recruitment have undertaken CT as part of their routine clinical care, limiting the amount of radiation required to undergo XV imaging
- The small study size means that secondary assessments and comparisons of XV and lung function tests may be underpowered

Keywords: Cystic fibrosis, X-ray Velocimetry, ventilation heterogeneity

Word count: 3673

## Introduction

### Cystic fibrosis

Cystic fibrosis is a life-limiting autosomal recessive genetic condition, with an incidence of approximately 1 in 2500 in the Caucasian population[1, 2]. It is caused by mutations in the gene that encodes for the cystic fibrosis transmembrane conductance regulator (*CFTR*), affecting chloride as well as bicarbonate ion transmembrane channel activity[1, 3]. Cystic fibrosis is a multi-system disorder, with *CFTR* dysfunction causing issues in the lung, pancreas, liver, bowel, sweat glands and vas deferens, amongst others.

There have been significant advances in the care of cystic fibrosis. With improved treatment of early complications and the use of pancreatic enzyme replacement, the primary morbidity and mortality is now related to pulmonary pathology, including bronchiectasis, small airway obstruction and progressive respiratory failure[1, 4].

### Pulmonary exacerbations

Pulmonary pathology is predominantly driven by inflammation, caused by the inability to clear micro-organisms. *CFTR* dysfunction causes impaired mucociliary clearance, however, multiple other factors also contribute, including mucus tethering and function, impaired innate immunity and increased intrinsic cellular inflammation[1, 5-7].

Those affected by cystic fibrosis have recurrent exacerbations of disease. Pulmonary exacerbations are defined symptomatically by increased cough and sputum production and may be associated with respiratory distress, fatigue and reduced exercise tolerance[8, 9]. Investigations including pulmonary function tests, chest imaging, sputum culture and blood inflammatory markers may assist with the clinical decision for treatment initiation and duration[1, 4, 8-10].

### Pulmonary assessment and monitoring

There are multiple methods available to assess pulmonary status in CF, including both functional and structural aspects. There are also developments being made in functional lung imaging, with new imaging modalities able to give visual and quantitative assessments of regional lung ventilation.

### Pulmonary function testing

The most commonly used pulmonary function test in CF is spirometry. Spirometry is a quick, non-invasive way to assess for airway obstruction or restriction. It requires significant respiratory effort and appropriate technique, meaning it is unsuitable for children less than 5-6 years of age. Reduced forced expiratory volume in 1 second (FEV1) is used as the main indicator of airway obstruction, indicating disease progression or pulmonary exacerbation[11, 12]. Body plethysmography can also

## OFFICIAL

1  
2  
3 be used to measure total lung capacity (TLC) and residual volume (RV), which can give an indication  
4 of gas trapping associated with airway obstruction. These assessments provide a global assessment  
5 of lung function. When there is ventilation inhomogeneity, they cannot identify whether there is  
6 potentially a compensated abnormality present[13].  
7

8  
9 Multiple breath washout (MBW) is another method of assessing pulmonary function. It has the  
10 benefit of being able to be performed in a younger age group due to less dependence on  
11 technique[14]. The lung clearance index (LCI) is the most commonly utilised outcome and reflects  
12 the global ventilation inhomogeneity. It has been shown to be associated with evidence of structural  
13 lung disease in patients with CF[15]. However, while it is associated with structural disease, it is not  
14 able to identify the location of any abnormality.  
15

### 16 Structural lung assessment

17 Structural assessment of the lungs in CF is generally performed through chest X-ray, computed  
18 tomography (CT) or magnetic resonance imaging (MRI).  
19

20  
21 Chest X-ray (CXR) is a quick and commonly used imaging technique. It can assess anatomical changes  
22 in the lungs and is generally recommended to be performed annually as part of routine CF care[12].  
23 However, it is limited by low resolution and is not sensitive enough to detect early structural lung  
24 changes associated with CF.  
25

26  
27 High Resolution Computed Tomography (HRCT) is the gold standard for identifying structural lung  
28 disease in CF[16]. There have been several scoring systems developed for CF lung disease, aimed at  
29 identifying evidence of structural damage including bronchiectasis, mucus plugging, bronchial wall  
30 thickening and atelectasis. The Perth-Rotterdam Annotated Grid Morphometric Analysis method  
31 (PRAGMA-CF) is a scoring system developed by Rosenow, et al, which showed improved correlation  
32 between neutrophilic inflammation and CT scores compared to previous methods, as well as  
33 stronger relationships between structural changes and trapped air progression[16]. It was also  
34 designed to provide reliable quantitative estimates of lung disease in young children, whereas  
35 previous methods were predominantly focused on older children and adults. While CT is the gold  
36 standard, it is associated with a higher ionising radiation dose than CXR.  
37

38  
39 MRI of the lung has traditionally been limited, largely due to the technical difficulties produced by  
40 low proton density (required for MRI to acquire an appropriate resonance signal) and artefact  
41 created by respiratory and cardiac motion[17]. There have been advances in MRI technology to  
42 improve lung image quality, with novel MR sequences able to depict some structural changes in CF.  
43 However, it is still limited by longer acquisition times and higher expense.  
44

### 45 Functional lung imaging

#### 46 *4D computed tomography*

47  
48 4D computed tomography has a diverse range of methods described in the literature. However, to  
49 calculate ventilation metrics they generally undergo three computational steps, including lung  
50 volume delineation, measurement of lung motion and algorithmic calculation of surrogate measures  
51 for regional ventilation[18, 19]. The most common algorithms are evaluation of lung volume changes  
52 using CT intensity or Hounsfield Unit values and deformation vectors[18].  
53

#### 54 *Xenon computed tomography*

55  
56 Xenon is an inert, noble gas. It has been used as an inhalational contrast agent for functional lung  
57 imaging due to its x-ray absorption characteristics, being similar to iodine[18, 20]. Xenon CT involves  
58 a wash-in phase, where the subject inhales a xenon and oxygen mixture, followed by a period of  
59 wash-out, where they inhale a high oxygen concentration while the radioisotope is exhaled or  
60

## OFFICIAL

1  
2  
3 absorbed. Images captured by CT are subsequently processed into three-dimensional distribution  
4 maps, where ventilation can be qualitatively and quantitatively assessed[18, 21].  
5

### 6 *Hyperpolarised gas magnetic resonance imaging*

7 Hyperpolarised gas MRI allows an evaluation of both pulmonary anatomy and function, by the  
8 visualisation of dynamic ventilation over the course of a respiratory cycle. The use of noble gas  
9 contrast agents, such as helium-3 or xenon-129, allows the circumvention of the traditional lack of  
10 proton signal in the lung and better image capture[17, 18, 22]. Ventilation imaging can provide  
11 information about defects (including calculation of the ventilation defect percentage, VDP, the  
12 percentage of lung with ventilation below 60% of the mean), and diffusion weighted imaging can be  
13 utilised to calculate the apparent diffusion coefficient to differentiate between normal and enlarged  
14 airspaces[18]. The primary limitations to uptake of hyperpolarised gas MRI is access to expensive  
15 hyperpolarising equipment, in addition to an MRI machine and the technical expertise required for  
16 testing.  
17  
18  
19

### 20 *X-ray Velocimetry*

21 X-ray Velocimetry (XV) is a novel form of X-ray imaging that was designed to collect lung ventilation  
22 data. The clinical implementation of this technique uses information collected via X-ray fluoroscopy  
23 to track the motion of the distinctive speckle pattern that is created by overlapping alveoli within the  
24 lung. In the current clinically available assessments in adults, single breath cine-scans using existing  
25 fluoroscopic imaging equipment are captured at 5 different angles during tidal breathing. When  
26 combined with a thoracic CT, the scans are used to construct a four-dimensional map (i.e. the 3-D  
27 volume changes, tracked over time) of regional lung tissue displacement during the breath[23, 24].  
28 This enables creation of a visual map of regional ventilation, derived from the quantitative measures  
29 of airflow, and provides metrics such as mean specific ventilation, ventilation heterogeneity (VH) and  
30 ventilation defect percentage (VDP)[23].  
31  
32  
33

34 XV technology has been validated in multiple animal models, including the  $\alpha$ -ENaC mouse model of  
35 CF lung disease, in which XV was able to visualise the patchy lung disease and identify regions of  
36 reduced airflow[24-26]. The technique has also shown a strong correlation with direct  
37 measurements using pneumotachography and plethysmography in a mouse model of bleomycin-  
38 induced pulmonary fibrosis[27], and been used to map airflow during high-frequency ventilation[28,  
39 29]. It has since been assessed in early-phase clinical trials in adult human subjects[30]. The first  
40 clinical validation was performed in a cohort of patients undergoing radiation therapy for various  
41 thoracic cancers, excluding lung cancer[31]. Regional lung ventilation was quantified and compared  
42 to spirometry and CT findings at baseline, 4 and 12 months after radiotherapy. Analysis showed  
43 correlation between XV ventilation data and both spirometry and CT. XV was also shown to be more  
44 sensitive in measuring alterations in regional lung function over time. Changes detected at 4 months  
45 via XV were not reflected in spirometry metrics at that time point, but became evident at 12 months  
46 post-radiotherapy[31].  
47  
48  
49

50 While XV imaging utilises X-rays, at the current stage of development it also requires a CT of the  
51 chest to provide a structural framework and boundaries for the software. The CT is not required for  
52 assessment of ventilation or parenchymal data. With further development the technique is aimed to  
53 no longer require any CT input and acquire all relevant information from fluoroscopy only.  
54  
55

## 56 **Aim**

57 The aim of this study is to investigate the feasibility of performing X-ray Velocimetry in paediatric  
58 patients with CF and in those with normal lungs. Before a statistically powered cohort study is  
59  
60

## OFFICIAL

1  
2  
3 undertaken to establish both a normative reference range and a CF diagnostic reference range, a  
4 pilot study was deemed necessary to determine if a properly powered study was possible, and to  
5 outline the optimal design features.  
6  
7

## 8 Methods and analysis

### 9 Study design overview

10 This is a cross-sectional, single-centre, pilot study. It will recruit children aged 3 to 18 years  
11 (inclusive) to have XV lung imaging performed. The study will recruit children without CF with  
12 healthy/normal lungs, and children with CF. Patients in both cohorts will be required to have had a  
13 CT scan within the last 6 months (or as per clinical judgement) or scheduled to have had a CT scan in  
14 an upcoming appointment as part of their normal clinical care.  
15  
16

17  
18 Patients will be recruited at the Women's and Children's Hospital, North Adelaide, Australia. They  
19 will undergo a clinical assessment with history and physical exam, undertake an XV scan, and  
20 perform at least one of spirometry, plethysmography and diffusing capacity, or multiple breath  
21 washout. Those with CF will also complete the CFQ-R Cystic Fibrosis questionnaire. The CFQ-R will be  
22 applied regularly in a follow-up longitudinal study. Investigators will not be blinded to cohort  
23 allocation.  
24  
25

### 26 Patient and public involvement

27 Patients and public were not involved in the design of this study. Separate to this study, a qualitative  
28 assessment of XV will be undertaken and results used to guide future, larger studies.  
29  
30

### 31 Ethics and dissemination

32 Ethical approval has been granted by The Women's and Children's Hospital Human Research Ethics  
33 Committee. (HREC ID 2021/HRE00396)  
34

35 All participants will provide written consent, either individually or by legal guardian if 16 or older, or  
36 by their legal guardian if younger than 16.  
37

38 Findings from this study will be disseminated through peer-reviewed publication and conferences.  
39

### 40 Study registration

41 The study has retrospective registration with the Australian New Zealand Clinical Trial Registry  
42 (ANZCTR): 1262000109606 and the Universal Trial Number (UTN): U1111-1287-9096.  
43  
44

### 45 Sample selection

46 20 patients will be recruited to both the healthy lung (control) and CF cohorts. A sample size of  $n=20$   
47 is within the range recommended for pilot studies to be able to detect adequate effect sizes as  
48 would be seen in comparative studies[32, 33].  
49

50 For each study arm, potential participants will be identified from medical record reports identifying  
51 young people aged 3-18 years who may meet our inclusion criteria. Reports of children who have  
52 had a CT scan of their chest within the past 3 months will be compiled by hospital administrators or  
53 data custodians of individual departments records for assessment by the study team for potential  
54 inclusion in the study.  
55  
56

### 57 Arm 1

58 Arm 1 will include those children with normal lungs. Given children will be required to have a chest  
59 CT, specific patient groups have been targeted. These include new-diagnosis oncology patients prior  
60



**OFFICIAL**

to treatment, physical trauma patients without evidence of lung injury, and rheumatology patients without evidence of pulmonary disease. Other patients identified as potentially suitable will be considered on a case-by-case basis.

**Arm 2**

Arm 2 will include those patients with CF.

*Inclusion criteria*

- Aged 3-18 years inclusive at time of consent
- CT scan performed within the last 6 months (or as per clinical judgement), or scheduled to have a CT in an upcoming appointment

*Exclusion criteria*

- Pre-existing lung disease in Arm 1, including asthma, interstitial lung disease etc.
- In Arm 2, a current or recent (within the past 4-6 weeks) pulmonary exacerbation as diagnosed by CF physician
- Currently receiving mechanical ventilation, intensive or critical care
- Contraindication to ionising radiation
- Urgent clinical treatment precluding the addition of XV imaging
- Inability to comply and remain still for period of XV image acquisition
- Inability to perform at least one of the pulmonary function tests listed previously.

**Intervention****Clinical assessment**

Patients will undergo a clinical history and physical examination. The clinical history will include past medical history, current medications and current symptomatology. Physical examination will measure clinical observations and include examination of the cardiac, respiratory and gastrointestinal systems.

**X-ray Velocimetry scan**

An XV scan will be performed in The Women's and Children's Hospital Radiology Department. The XV scan involves fluoroscopic imaging of tidal breathing from 5 different angles (AP, +/- 36°, +/- 60°). The images will be sent to 4DMedical, Melbourne, and a report generated via their X-ray Velocimetry Lung Ventilation Analysis Software (XV LVAS) platform. Tissue expansion is calculated to assess ventilation at a regional level within the lung. Ventilation is determined by measuring the change in volume of a specific lung region during inhalation and dividing it by the volume of that same region at the end of exhalation. This calculation generates a unit called specific ventilation (SV), which quantifies volume changes in mm<sup>3</sup> for each individual lung region. Regions that inflate more have higher SV. The SV measurements are presented as a coloured contour image map of the lungs illustrating the spectrum of ventilation measurements during breathing.

XV LVAS report metrics include:

- Tidal Volume (TV) – the volume of air inhaled from start of inspiration to peak inspiration
- Mean Specific Ventilation (MSV) – the mean of specific ventilation across all regions of the lung
- Ventilation Defect Percentage (VDP) – measures the percentage of lung volume that is below 60% of the mean specific ventilation
- Ventilation Heterogeneity (VH) – measures the overall variability of ventilation across the lung

## OFFICIAL

## Pulmonary function testing

Pulmonary function testing will be performed in the Women's and Children's Hospital Lung Laboratory, a nationally accredited pulmonary function testing centre, under the auspices of the Thoracic Society of Australia and New Zealand.

### *Multiple breath washout*

Eco Medics Exhalysers D equipment will be used to perform nitrogen multiple breath washout testing to generate the Lung Clearance Index.

### *Spirometry and body plethysmography*

Spirometry and DLCO tests will be performed on a Medisoft Spiro Air, as per ERS/ATS standards[34, 35]. Plethysmography testing will be performed using Medisoft bodybox, also as per ERS/ATS standard[36].

## Outcome measures

### Primary

The primary outcome measure from this study is to investigate the feasibility of recruiting 20 children without CF and 20 children with CF from our centre to complete an XV scan and the other assessments listed above.

This data will determine if a larger, statistically-powered study can be undertaken at this site to evaluate the diagnostic capabilities of XV imaging, which may be able to better measure lung health compared to existing methods.

### Secondary

Appropriateness of XV LVAS technology as a clinical assessment for lung function, compared to standard and specialised pulmonary lung function techniques

This will be measured by comparisons of XV-LVAS report metrics to report metrics of existing pulmonary function testing, including spirometry, plethysmography and diffusion capacity, and lung clearance index.

Appropriateness of XV LVAS technology as a clinical assessment for structural lung disease, compared to CT imaging

XV LVAS report metrics will be compared to CT chest evidence of structural lung disease, assessed via PRAGMA-CF scoring.

Identify which participant characteristics should be considered to clinically evaluate lobar ventilation distribution, ventilation heterogeneity and expiratory time constant

This will be determined through visual inspection of characteristic data and identification of potential factors that may influence report metrics. Factors will be considered where correlation trends are observed in continuous and dichotomous variables.

Identify if ongoing assessment of ventilation distribution, ventilation heterogeneity and expiratory time constant is safe and clinically appropriate

This will be determined through a retrospective evaluation of CT scan frequency among the young people with CF, identification of any adverse events during and immediately following XV imaging and preliminary appropriateness of XV LVAS testing.

## OFFICIAL

## Data analysis

The XV, lung function and CT outcome data obtained from this study will be described by group, using descriptive statistics. Continuous variables will be described using mean and standard deviation, or median and interquartile range if the distribution is asymmetric. Categorical variables will be presented as numbers and percentages. Demographic variables age, sex, height and weight will also be described by group. Statistical association between outcome measures will be assessed graphically and described using correlation coefficients.

## Data storage

All data for an individual participant will be collected by the principal investigator or their delegated nominees and recorded in the patient record. Participant identification will be through their unique participant study number. All clinical data will be stored as per SA Health data storage guidelines.

Standard clinical lung function data will be collected and stored securely as per WCH guidelines. Each participant's lung function data will be identified by hospital unique record number (URN) initially, then de-identified using a numerical code before being sent to statisticians for analysis.

Pre-existing radiological data (i.e., CT chest) will continue to be stored as per routine clinical data in the WCH Radiology Department, using secure WCH server and SA Health computers.

De-identified XV LVAS data will be stored in the WCH Respiratory and Sleep Department using the WCH SA Health Network server. Data will be stored for a minimum of 30 years, according to WCH data-retention requirements.

At the conclusion of the study, all hard copy case report forms, signed consent forms and trial data will be archived according to the Respiratory Clinical Trial Unit's Archiving SOP at Iron Mountain.

## Adverse events and analysis

Lung function testing entails standard procedures that are well established. The testing staff are trained and experienced in recognising and dealing with potential risks, as a normal part of routine testing. Some procedures require special breathing efforts. Known risks are:

- Dizziness
- Feeling short of breath
- Coughing
- Asthma attack precipitated by deep inhalation

XV imaging protocol involves exposure to ionising radiation. The radiation dose in the research portion of the study is low, estimated to between 0.52 – 0.83 mSv, equivalent to between 2-5 standard chest X-rays. A detailed analysis of the expected radiation exposure has been undertaken by the assessors in the South Australian Medical Imaging Department prior to study commencement. As per the Australian Radiation Protection and Nuclear Safety Agency (ARPANSA) Code of Practice for the Exposure of Humans to Ionizing Radiation for Research Purposes, the radiation exposure is classified as category IIa or "very-low risk"[37]. The radiation dose administered during XV imaging will be monitored and recorded. Exposure settings of the XV scans will be adjusted to administer the lowest practicable dose while still achieving technically useable results.

OFFICIAL

## Sponsorship

This study is supported by 4DMedical, who will provide the XV LVAS reports for patients undergoing XV imaging. 4DMedical have no input into study design, outcome analyses, or study conclusions.

## Challenges in study design

To allow for appropriate XV LVAS mapping and report, a chest CT is currently required to provide the anatomical framework. Given the radiation dose required for CT of the chest region, it is not ethically appropriate to perform a chest CT in children, in addition to that required for routine clinical care. This is particularly the case in those with healthy lungs where a chest CT assessment is not clinically indicated. This limits the eligible normal lung patient cohort considerably, given the relative clinical reluctance to perform CT in children compared to adults. Some potential cohorts of eligible patients, for example oncology patients, have routine CT. They also, however, frequently receive agents with known pulmonary side effects. A further limitation is that it will be common to be unable to perform the additional XV imaging and pulmonary function tests on a child in the emotionally difficult period between an oncological diagnosis with routine screening CT and subsequent rapid initiation of treatment.

Pulmonary function testing is dependent on compliance and technique. Children less than 5-6 years of age will be unable to undergo spirometry and plethysmography. In the cohort 5 years and over there can still be technique issues affecting accurate results. This may affect the ability to compare XV imaging with standard lung function metrics in some younger children, however this will not affect the primary study outcome of feasibility.

## Future trial considerations

A feasibility study design is necessary to determine if it is possible to recruit and test children without CF with healthy lungs as well as those with CF to participate in an XV imaging study. This is an important first step towards establishing a statistically-powered cohort study. Such a study would evaluate XV LVAS outcomes in children with normal lung function and anatomy that can be used to provide normal reference range data sets against which putative disease states can be examined.

Since XV is a new lung function imaging technology, studies to establish a reference range are a prerequisite before clinical adoption of the technique for diagnosis and monitoring of children with lung pathology.

## Article summary

This is one of the first studies to investigate XV imaging in a paediatric cohort. Enrolment of participants is ongoing in 2023 and final results are expected by the end of 2024.

Author contributions:

MB: Recruitment, draft and review/editing of final manuscript. AT, TG: concept, study design, ethics submission and approval, recruitment and review/editing of final manuscript. MD: concept, study design and review/editing of final manuscript. KCC: concept, design and review/editing of final manuscript. DP: concept, study design, ethics submission and approval, review/editing of final manuscript. JP: recruitment and review/editing of final manuscript.

Acknowledgments:

Nil additional

OFFICIAL

## OFFICIAL

## Conflicts of interest:

DP has received remuneration for research advice from 4DMedical. DP and MD have both purchased shares in 4DMedical Ltd

## Funding:

This project is supported by a seed grant from 4DMedical

## References

1. Elborn, J.S., *Cystic fibrosis*. Lancet, 2016. **388**(10059): p. 2519-2531.
2. Ahern, S., et al., *Australian Cystic Fibrosis Data Registry Annual Report 2020*. Monash University Department of Epidemiology and Preventative Medicine, 2021(22).
3. Ong, T. and B.W. Ramsey, *Cystic Fibrosis*. JAMA, 2023. **329**(21): p. 1859.
4. Bell, S.C., et al., *The future of cystic fibrosis care: a global perspective*. Lancet Respir Med, 2020. **8**(1): p. 65-124.
5. Quinton, P.M., *Cystic fibrosis: impaired bicarbonate secretion and mucoviscidosis*. Lancet, 2008. **372**(9636): p. 415-7.
6. Keiser, N.W., et al., *Defective innate immunity and hyperinflammation in newborn cystic fibrosis transmembrane conductance regulator-knockout ferret lungs*. Am J Respir Cell Mol Biol, 2015. **52**(6): p. 683-94.
7. Hoegger, M.J., et al., *Impaired mucus detachment disrupts mucociliary transport in a piglet model of cystic fibrosis*. Science, 2014. **345**(6198): p. 818-22.
8. Goss, C.H., *Acute Pulmonary Exacerbations in Cystic Fibrosis*. Semin Respir Crit Care Med, 2019. **40**(6): p. 792-803.
9. Carter, S.C., et al., *Acute Pulmonary Exacerbation Phenotypes in Patients with Cystic Fibrosis*. Ann Am Thorac Soc, 2022. **19**(11): p. 1818-1826.
10. Goss, C.H., et al., *A Randomized Trial of Antimicrobial Duration for Cystic Fibrosis Pulmonary Exacerbation Treatment*. Am J Respir Crit Care Med, 2021.
11. Stanojevic, S., et al., *Global Lung Function Initiative equations improve interpretation of FEV1 decline among patients with cystic fibrosis*. Eur Respir J, 2015. **46**(1): p. 262-4.
12. Kerem, E., et al., *Standards of care for patients with cystic fibrosis: a European consensus*. J Cyst Fibros, 2005. **4**(1): p. 7-26.
13. Davies, J., et al., *Assessment of clinical response to ivacaftor with lung clearance index in cystic fibrosis patients with a G551D-CFTR mutation and preserved spirometry: a randomised controlled trial*. Lancet Respir Med, 2013. **1**(8): p. 630-638.
14. Robinson, P.D., et al., *Preschool Multiple-Breath Washout Testing. An Official American Thoracic Society Technical Statement*. Am J Respir Crit Care Med, 2018. **197**(5): p. e1-e19.
15. Svedberg, M., et al., *Longitudinal lung clearance index and association with structural lung damage in children with cystic fibrosis*. Thorax, 2023. **78**(2): p. 176-182.
16. Rosenow, T., et al., *PRAGMA-CF. A Quantitative Structural Lung Disease Computed Tomography Outcome in Young Children with Cystic Fibrosis*. Am J Respir Crit Care Med, 2015. **191**(10): p. 1158-65.
17. Dournes, G., et al., *The Clinical Use of Lung MRI in Cystic Fibrosis: What, Now, How?* Chest, 2021. **159**(6): p. 2205-2217.
18. Karmali, D., et al., *Functional imaging for assessing regional lung ventilation in preclinical and clinical research*. Front Med (Lausanne), 2023. **10**: p. 1160292.

## OFFICIAL

19. Jahani, N., et al., *Assessment of regional ventilation and deformation using 4D-CT imaging for healthy human lungs during tidal breathing*. J Appl Physiol (1985), 2015. **119**(10): p. 1064-74.
20. Ohno, Y., et al., *Comparison of Xenon-Enhanced Area-Detector CT and Krypton Ventilation SPECT/CT for Assessment of Pulmonary Functional Loss and Disease Severity in Smokers*. AJR Am J Roentgenol, 2018. **210**(2): p. W45-W53.
21. Kong, X., et al., *Xenon-enhanced dual-energy CT lung ventilation imaging: techniques and clinical applications*. AJR Am J Roentgenol, 2014. **202**(2): p. 309-17.
22. Kolodziej, M., et al., *Lung function imaging methods in Cystic Fibrosis pulmonary disease*. Respir Res, 2017. **18**(1): p. 96.
23. Parsons, D. and M. Donnelley, *Will Airway Gene Therapy for Cystic Fibrosis Improve Lung Function? New Imaging Technologies Can Help Us Find Out*. Hum Gene Ther, 2020. **31**(17-18): p. 973-984.
24. Murrie, R.P., et al., *Real-time in vivo imaging of regional lung function in a mouse model of cystic fibrosis on a laboratory X-ray source*. Sci Rep, 2020. **10**(1): p. 447.
25. Werdiger, F., et al., *Quantification of muco-obstructive lung disease variability in mice via laboratory X-ray velocimetry*. Scientific Reports, 2020. **10**(1).
26. Stahr, C.S., et al., *Quantification of heterogeneity in lung disease with image-based pulmonary function testing*. Scientific Reports, 2016. **6**(1): p. 29438.
27. Fouras, A., et al., *Altered lung motion is a sensitive indicator of regional lung disease*. Ann Biomed Eng, 2012. **40**(5): p. 1160-9.
28. Thurgood, J., et al., *Functional lung imaging during HFV in preterm rabbits*. PLoS One, 2012. **7**(10): p. e48122.
29. Kitchen, M.J., et al., *Dynamic measures of regional lung air volume using phase contrast x-ray imaging*. Phys Med Biol, 2008. **53**(21): p. 6065-77.
30. Kirkness, J.P., et al., *Association of x-ray velocimetry (XV) ventilation analysis compared to spirometry*. Front Med Technol, 2023. **5**: p. 1148310.
31. Dusting, J.S., O. Wenger, D. Doshi, C. De Marco, J. Martin, C. et al, *First-in-human validation of x-ray velocimetry demonstrates superior sensitivity over spirometry and CT for quantification of regional lung function [abstract]*. Chest, 2020. **158**: p. A1393-4.
32. Whitehead, A.L., et al., *Estimating the sample size for a pilot randomised trial to minimise the overall trial sample size for the external pilot and main trial for a continuous outcome variable*. Statistical Methods in Medical Research, 2016. **25**(3): p. 1057-1073.
33. Bell, M.L., *New guidance to improve sample size calculations for trials: eliciting the target difference*. Trials, 2018. **19**(1).
34. Graham, B.L., et al., *Standardization of Spirometry 2019 Update. An Official American Thoracic Society and European Respiratory Society Technical Statement*. Am J Respir Crit Care Med, 2019. **200**(8): p. e70-e88.
35. Graham, B.L., et al., *2017 ERS/ATS standards for single-breath carbon monoxide uptake in the lung*. Eur Respir J, 2017. **49**(1).
36. Wanger, J., et al., *Standardisation of the measurement of lung volumes*. Eur Respir J, 2005. **26**(3): p. 511-22.
37. Prof Richard Smart, D.G.D., Ms Sarah Wong, Ms Rosemary Marcon, Dr Nicholas Daunt, *Code of Practice: Exposure of Humans to Ionizing Radiation for Research Purposes*, A.R.P.a.N.S. Agency, Editor. 2005, Australian Government.

## OFFICIAL



# Reporting checklist for protocol of a clinical trial.

Based on the SPIRIT guidelines.

## Instructions to authors

Complete this checklist by entering the page numbers from your manuscript where readers will find each of the items listed below.

Your article may not currently address all the items on the checklist. Please modify your text to include the missing information. If you are certain that an item does not apply, please write "n/a" and provide a short explanation.

Upload your completed checklist as an extra file when you submit to a journal.

In your methods section, say that you used the SPIRIT reporting guidelines, and cite them as:

Chan A-W, Tetzlaff JM, Gøtzsche PC, Altman DG, Mann H, Berlin J, Dickersin K, Hróbjartsson A, Schulz KF, Parulekar WR, Krleža-Jerić K, Laupacis A, Moher D. SPIRIT 2013 Explanation and Elaboration: Guidance for protocols of clinical trials. *BMJ*. 2013;346:e7586

|                                   |                                                                                                                                 | Page   |
|-----------------------------------|---------------------------------------------------------------------------------------------------------------------------------|--------|
|                                   | Reporting Item                                                                                                                  | Number |
| <b>Administrative information</b> |                                                                                                                                 |        |
| Title                             | <a href="#">#1</a> Descriptive title identifying the study design, population, interventions, and, if applicable, trial acronym | 1      |



|    |                     |                     |                                                            |     |
|----|---------------------|---------------------|------------------------------------------------------------|-----|
| 1  | Trial registration  | <a href="#">#2a</a> | Trial identifier and registry name. If not yet registered, | 5   |
| 2  |                     |                     |                                                            |     |
| 3  |                     |                     | name of intended registry                                  |     |
| 4  |                     |                     |                                                            |     |
| 5  |                     |                     |                                                            |     |
| 6  | Trial registration: | <a href="#">#2b</a> | All items from the World Health Organization Trial         | 5   |
| 7  |                     |                     |                                                            |     |
| 8  | data set            |                     | Registration Data Set                                      |     |
| 9  |                     |                     |                                                            |     |
| 10 |                     |                     |                                                            |     |
| 11 |                     |                     |                                                            |     |
| 12 | Protocol version    | <a href="#">#3</a>  | Date and version identifier                                | 1   |
| 13 |                     |                     |                                                            |     |
| 14 |                     |                     |                                                            |     |
| 15 | Funding             | <a href="#">#4</a>  | Sources and types of financial, material, and other        | 9   |
| 16 |                     |                     |                                                            |     |
| 17 |                     |                     | support                                                    |     |
| 18 |                     |                     |                                                            |     |
| 19 |                     |                     |                                                            |     |
| 20 | Roles and           | <a href="#">#5a</a> | Names, affiliations, and roles of protocol contributors    | 9   |
| 21 |                     |                     |                                                            |     |
| 22 | responsibilities:   |                     |                                                            |     |
| 23 |                     |                     |                                                            |     |
| 24 | contributorship     |                     |                                                            |     |
| 25 |                     |                     |                                                            |     |
| 26 |                     |                     |                                                            |     |
| 27 |                     |                     |                                                            |     |
| 28 | Roles and           | <a href="#">#5b</a> | Name and contact information for the trial sponsor         | n/a |
| 29 |                     |                     |                                                            |     |
| 30 | responsibilities:   |                     |                                                            |     |
| 31 |                     |                     |                                                            |     |
| 32 | sponsor contact     |                     |                                                            |     |
| 33 |                     |                     |                                                            |     |
| 34 | information         |                     |                                                            |     |
| 35 |                     |                     |                                                            |     |
| 36 |                     |                     |                                                            |     |
| 37 |                     |                     |                                                            |     |
| 38 | Roles and           | <a href="#">#5c</a> | Role of study sponsor and funders, if any, in study        | n/a |
| 39 |                     |                     |                                                            |     |
| 40 | responsibilities:   |                     | design; collection, management, analysis, and              |     |
| 41 |                     |                     |                                                            |     |
| 42 | sponsor and funder  |                     | interpretation of data; writing of the report; and the     |     |
| 43 |                     |                     |                                                            |     |
| 44 |                     |                     | decision to submit the report for publication, including   |     |
| 45 |                     |                     |                                                            |     |
| 46 |                     |                     | whether they will have ultimate authority over any of      |     |
| 47 |                     |                     |                                                            |     |
| 48 |                     |                     | these activities                                           |     |
| 49 |                     |                     |                                                            |     |
| 50 |                     |                     |                                                            |     |
| 51 |                     |                     |                                                            |     |
| 52 |                     |                     |                                                            |     |
| 53 |                     |                     |                                                            |     |
| 54 |                     |                     |                                                            |     |
| 55 |                     |                     |                                                            |     |
| 56 |                     |                     |                                                            |     |
| 57 |                     |                     |                                                            |     |
| 58 |                     |                     |                                                            |     |
| 59 |                     |                     |                                                            |     |
| 60 |                     |                     |                                                            |     |

1 Roles and [#5d](#) Composition, roles, and responsibilities of the n/a  
 2  
 3 responsibilities:  
 4 coordinating centre, steering committee, endpoint  
 5 committees  
 6 adjudication committee, data management team, and  
 7  
 8 other individuals or groups overseeing the trial, if  
 9  
 10 applicable (see Item 21a for data monitoring committee)  
 11  
 12

## 13 Introduction

14  
 15  
 16 Background and [#6a](#) Description of research question and justification for 1-3  
 17 rationale  
 18 undertaking the trial, including summary of relevant  
 19 studies (published and unpublished) examining benefits  
 20 and harms for each intervention  
 21  
 22  
 23  
 24

25  
 26 Background and [#6b](#) Explanation for choice of comparators 1-3  
 27 rationale: choice of  
 28 comparators  
 29  
 30  
 31  
 32  
 33

34 Objectives [#7](#) Specific objectives or hypotheses 4  
 35  
 36

37 Trial design [#8](#) Description of trial design including type of trial (eg, 5  
 38 parallel group, crossover, factorial, single group),  
 39 allocation ratio, and framework (eg, superiority,  
 40 equivalence, non-inferiority, exploratory)  
 41  
 42  
 43  
 44  
 45  
 46

## 47 Methods:

48  
 49 Participants,  
 50 interventions, and  
 51 outcomes  
 52  
 53  
 54  
 55  
 56  
 57  
 58  
 59  
 60

|    |                      |                      |                                                              |     |
|----|----------------------|----------------------|--------------------------------------------------------------|-----|
| 1  | Study setting        | <a href="#">#9</a>   | Description of study settings (eg, community clinic,         | 5   |
| 2  |                      |                      | academic hospital) and list of countries where data will be  |     |
| 3  |                      |                      | collected. Reference to where list of study sites can be     |     |
| 4  |                      |                      | obtained                                                     |     |
| 5  |                      |                      |                                                              |     |
| 6  |                      |                      |                                                              |     |
| 7  |                      |                      |                                                              |     |
| 8  |                      |                      |                                                              |     |
| 9  |                      |                      |                                                              |     |
| 10 |                      |                      |                                                              |     |
| 11 | Eligibility criteria | <a href="#">#10</a>  | Inclusion and exclusion criteria for participants. If        | 5-6 |
| 12 |                      |                      | applicable, eligibility criteria for study centres and       |     |
| 13 |                      |                      | individuals who will perform the interventions (eg,          |     |
| 14 |                      |                      | surgeons, psychotherapists)                                  |     |
| 15 |                      |                      |                                                              |     |
| 16 |                      |                      |                                                              |     |
| 17 |                      |                      |                                                              |     |
| 18 |                      |                      |                                                              |     |
| 19 |                      |                      |                                                              |     |
| 20 |                      |                      |                                                              |     |
| 21 | Interventions:       | <a href="#">#11a</a> | Interventions for each group with sufficient detail to allow | 6   |
| 22 |                      |                      | replication, including how and when they will be             |     |
| 23 | description          |                      | administered                                                 |     |
| 24 |                      |                      |                                                              |     |
| 25 |                      |                      |                                                              |     |
| 26 |                      |                      |                                                              |     |
| 27 |                      |                      |                                                              |     |
| 28 |                      |                      |                                                              |     |
| 29 | Interventions:       | <a href="#">#11b</a> | Criteria for discontinuing or modifying allocated            | n/a |
| 30 |                      |                      | interventions for a given trial participant (eg, drug dose   |     |
| 31 | modifications        |                      | change in response to harms, participant request, or         |     |
| 32 |                      |                      | improving / worsening disease)                               |     |
| 33 |                      |                      |                                                              |     |
| 34 |                      |                      |                                                              |     |
| 35 |                      |                      |                                                              |     |
| 36 |                      |                      |                                                              |     |
| 37 |                      |                      |                                                              |     |
| 38 |                      |                      |                                                              |     |
| 39 | Interventions:       | <a href="#">#11c</a> | Strategies to improve adherence to intervention protocols,   | n/a |
| 40 |                      |                      | and any procedures for monitoring adherence (eg, drug        |     |
| 41 | adherence            |                      | tablet return; laboratory tests)                             |     |
| 42 |                      |                      |                                                              |     |
| 43 |                      |                      |                                                              |     |
| 44 |                      |                      |                                                              |     |
| 45 |                      |                      |                                                              |     |
| 46 | Interventions:       | <a href="#">#11d</a> | Relevant concomitant care and interventions that are         | n/a |
| 47 |                      |                      | permitted or prohibited during the trial                     |     |
| 48 | concomitant care     |                      |                                                              |     |
| 49 |                      |                      |                                                              |     |
| 50 |                      |                      |                                                              |     |
| 51 | Outcomes             | <a href="#">#12</a>  | Primary, secondary, and other outcomes, including the        | 7   |
| 52 |                      |                      | specific measurement variable (eg, systolic blood            |     |
| 53 |                      |                      | pressure), analysis metric (eg, change from baseline, final  |     |
| 54 |                      |                      |                                                              |     |
| 55 |                      |                      |                                                              |     |
| 56 |                      |                      |                                                              |     |
| 57 |                      |                      |                                                              |     |
| 58 |                      |                      |                                                              |     |
| 59 |                      |                      |                                                              |     |
| 60 |                      |                      |                                                              |     |

value, time to event), method of aggregation (eg, median, proportion), and time point for each outcome. Explanation of the clinical relevance of chosen efficacy and harm outcomes is strongly recommended

|                                                                                                       |                                                                               |                      |                                                                                                                                                                                                                                                                                   |     |
|-------------------------------------------------------------------------------------------------------|-------------------------------------------------------------------------------|----------------------|-----------------------------------------------------------------------------------------------------------------------------------------------------------------------------------------------------------------------------------------------------------------------------------|-----|
| 1<br>2<br>3<br>4<br>5<br>6<br>7<br>8<br>9<br>10<br>11<br>12<br>13<br>14<br>15<br>16<br>17<br>18<br>19 | Participant timeline                                                          | <a href="#">#13</a>  | Time schedule of enrolment, interventions (including any run-ins and washouts), assessments, and visits for participants. A schematic diagram is highly recommended (see Figure)                                                                                                  | 7   |
| 20<br>21<br>22<br>23<br>24<br>25<br>26<br>27<br>28<br>29                                              | Sample size                                                                   | <a href="#">#14</a>  | Estimated number of participants needed to achieve study objectives and how it was determined, including clinical and statistical assumptions supporting any sample size calculations                                                                                             | 7   |
| 30<br>31<br>32<br>33<br>34                                                                            | Recruitment                                                                   | <a href="#">#15</a>  | Strategies for achieving adequate participant enrolment to reach target sample size                                                                                                                                                                                               | 5   |
| 35<br>36<br>37<br>38<br>39<br>40<br>41<br>42<br>43<br>44                                              | <b>Methods:</b><br><b>Assignment of interventions (for controlled trials)</b> |                      |                                                                                                                                                                                                                                                                                   |     |
| 45<br>46<br>47<br>48<br>49<br>50<br>51<br>52<br>53<br>54<br>55<br>56<br>57<br>58<br>59<br>60          | Allocation: sequence generation                                               | <a href="#">#16a</a> | Method of generating the allocation sequence (eg, computer-generated random numbers), and list of any factors for stratification. To reduce predictability of a random sequence, details of any planned restriction (eg, blocking) should be provided in a separate document that | n/a |

|    |                      |                                                                                 |     |
|----|----------------------|---------------------------------------------------------------------------------|-----|
| 1  |                      | is unavailable to those who enrol participants or assign                        |     |
| 2  |                      |                                                                                 |     |
| 3  |                      | interventions                                                                   |     |
| 4  |                      |                                                                                 |     |
| 5  |                      |                                                                                 |     |
| 6  | Allocation           | <a href="#">#16b</a> Mechanism of implementing the allocation sequence (eg,     | n/a |
| 7  |                      |                                                                                 |     |
| 8  | concealment          | central telephone; sequentially numbered, opaque,                               |     |
| 9  |                      |                                                                                 |     |
| 10 | mechanism            | sealed envelopes), describing any steps to conceal the                          |     |
| 11 |                      |                                                                                 |     |
| 12 |                      | sequence until interventions are assigned                                       |     |
| 13 |                      |                                                                                 |     |
| 14 |                      |                                                                                 |     |
| 15 |                      |                                                                                 |     |
| 16 | Allocation:          | <a href="#">#16c</a> Who will generate the allocation sequence, who will enrol  | n/a |
| 17 |                      |                                                                                 |     |
| 18 | implementation       | participants, and who will assign participants to                               |     |
| 19 |                      |                                                                                 |     |
| 20 |                      | interventions                                                                   |     |
| 21 |                      |                                                                                 |     |
| 22 |                      |                                                                                 |     |
| 23 | Blinding (masking)   | <a href="#">#17a</a> Who will be blinded after assignment to interventions (eg, | n/a |
| 24 |                      |                                                                                 |     |
| 25 |                      | trial participants, care providers, outcome assessors, data                     |     |
| 26 |                      |                                                                                 |     |
| 27 |                      | analysts), and how                                                              |     |
| 28 |                      |                                                                                 |     |
| 29 |                      |                                                                                 |     |
| 30 |                      |                                                                                 |     |
| 31 | Blinding (masking):  | <a href="#">#17b</a> If blinded, circumstances under which unblinding is        | n/a |
| 32 |                      |                                                                                 |     |
| 33 | emergency            | permissible, and procedure for revealing a participant's                        |     |
| 34 |                      |                                                                                 |     |
| 35 | unblinding           | allocated intervention during the trial                                         |     |
| 36 |                      |                                                                                 |     |
| 37 |                      |                                                                                 |     |
| 38 |                      |                                                                                 |     |
| 39 | <b>Methods: Data</b> |                                                                                 |     |
| 40 |                      |                                                                                 |     |
| 41 | collection,          |                                                                                 |     |
| 42 |                      |                                                                                 |     |
| 43 | management, and      |                                                                                 |     |
| 44 |                      |                                                                                 |     |
| 45 | analysis             |                                                                                 |     |
| 46 |                      |                                                                                 |     |
| 47 |                      |                                                                                 |     |
| 48 | Data collection plan | <a href="#">#18a</a> Plans for assessment and collection of outcome,            | 7   |
| 49 |                      |                                                                                 |     |
| 50 |                      | baseline, and other trial data, including any related                           |     |
| 51 |                      |                                                                                 |     |
| 52 |                      | processes to promote data quality (eg, duplicate                                |     |
| 53 |                      |                                                                                 |     |
| 54 |                      | measurements, training of assessors) and a description                          |     |
| 55 |                      |                                                                                 |     |
| 56 |                      |                                                                                 |     |
| 57 |                      |                                                                                 |     |
| 58 |                      |                                                                                 |     |
| 59 |                      |                                                                                 |     |
| 60 |                      |                                                                                 |     |

of study instruments (eg, questionnaires, laboratory tests) along with their reliability and validity, if known. Reference to where data collection forms can be found, if not in the protocol

|                                                                                                       |                                                  |                                                                                                                                                                                                                                                                                       |     |
|-------------------------------------------------------------------------------------------------------|--------------------------------------------------|---------------------------------------------------------------------------------------------------------------------------------------------------------------------------------------------------------------------------------------------------------------------------------------|-----|
| 1<br>2<br>3<br>4<br>5<br>6<br>7<br>8<br>9<br>10<br>11<br>12<br>13<br>14<br>15<br>16<br>17<br>18<br>19 | Data collection plan: retention                  | <a href="#">#18b</a> Plans to promote participant retention and complete follow-up, including list of any outcome data to be collected for participants who discontinue or deviate from intervention protocols                                                                        | 7-8 |
| 20<br>21<br>22<br>23<br>24<br>25<br>26<br>27<br>28<br>29<br>30<br>31                                  | Data management                                  | <a href="#">#19</a> Plans for data entry, coding, security, and storage, including any related processes to promote data quality (eg, double data entry; range checks for data values). Reference to where details of data management procedures can be found, if not in the protocol | 7-8 |
| 32<br>33<br>34<br>35<br>36<br>37<br>38<br>39                                                          | Statistics: outcomes                             | <a href="#">#20a</a> Statistical methods for analysing primary and secondary outcomes. Reference to where other details of the statistical analysis plan can be found, if not in the protocol                                                                                         | 7   |
| 40<br>41<br>42<br>43<br>44                                                                            | Statistics: additional analyses                  | <a href="#">#20b</a> Methods for any additional analyses (eg, subgroup and adjusted analyses)                                                                                                                                                                                         | 7   |
| 45<br>46<br>47<br>48<br>49<br>50<br>51<br>52<br>53<br>54                                              | Statistics: analysis population and missing data | <a href="#">#20c</a> Definition of analysis population relating to protocol non-adherence (eg, as randomised analysis), and any statistical methods to handle missing data (eg, multiple imputation)                                                                                  | n/a |

## Methods: Monitoring

|    |                      |                      |                                                             |     |
|----|----------------------|----------------------|-------------------------------------------------------------|-----|
| 1  | Data monitoring:     | <a href="#">#21a</a> | Composition of data monitoring committee (DMC);             | n/a |
| 2  |                      |                      |                                                             |     |
| 3  | formal committee     |                      | summary of its role and reporting structure; statement of   |     |
| 4  |                      |                      | whether it is independent from the sponsor and              |     |
| 5  |                      |                      | competing interests; and reference to where further         |     |
| 6  |                      |                      | details about its charter can be found, if not in the       |     |
| 7  |                      |                      | protocol. Alternatively, an explanation of why a DMC is     |     |
| 8  |                      |                      | not needed                                                  |     |
| 9  |                      |                      |                                                             |     |
| 10 | Data monitoring:     | <a href="#">#21b</a> | Description of any interim analyses and stopping            | n/a |
| 11 |                      |                      |                                                             |     |
| 12 | interim analysis     |                      | guidelines, including who will have access to these         |     |
| 13 |                      |                      | interim results and make the final decision to terminate    |     |
| 14 |                      |                      | the trial                                                   |     |
| 15 |                      |                      |                                                             |     |
| 16 | Harms                | <a href="#">#22</a>  | Plans for collecting, assessing, reporting, and managing    | 8   |
| 17 |                      |                      | solicited and spontaneously reported adverse events and     |     |
| 18 |                      |                      | other unintended effects of trial interventions or trial    |     |
| 19 |                      |                      | conduct                                                     |     |
| 20 |                      |                      |                                                             |     |
| 21 | Auditing             | <a href="#">#23</a>  | Frequency and procedures for auditing trial conduct, if     | 5   |
| 22 |                      |                      | any, and whether the process will be independent from       |     |
| 23 |                      |                      | investigators and the sponsor                               |     |
| 24 |                      |                      |                                                             |     |
| 25 | <b>Ethics and</b>    |                      |                                                             |     |
| 26 | <b>dissemination</b> |                      |                                                             |     |
| 27 |                      |                      |                                                             |     |
| 28 | Research ethics      | <a href="#">#24</a>  | Plans for seeking research ethics committee / institutional | 5   |
| 29 |                      |                      |                                                             |     |
| 30 | approval             |                      | review board (REC / IRB) approval                           |     |
| 31 |                      |                      |                                                             |     |
| 32 |                      |                      |                                                             |     |
| 33 |                      |                      |                                                             |     |
| 34 |                      |                      |                                                             |     |
| 35 |                      |                      |                                                             |     |
| 36 |                      |                      |                                                             |     |
| 37 |                      |                      |                                                             |     |
| 38 |                      |                      |                                                             |     |
| 39 |                      |                      |                                                             |     |
| 40 |                      |                      |                                                             |     |
| 41 |                      |                      |                                                             |     |
| 42 |                      |                      |                                                             |     |
| 43 |                      |                      |                                                             |     |
| 44 |                      |                      |                                                             |     |
| 45 |                      |                      |                                                             |     |
| 46 |                      |                      |                                                             |     |
| 47 |                      |                      |                                                             |     |
| 48 |                      |                      |                                                             |     |
| 49 |                      |                      |                                                             |     |
| 50 |                      |                      |                                                             |     |
| 51 |                      |                      |                                                             |     |
| 52 |                      |                      |                                                             |     |
| 53 |                      |                      |                                                             |     |
| 54 |                      |                      |                                                             |     |
| 55 |                      |                      |                                                             |     |
| 56 |                      |                      |                                                             |     |
| 57 |                      |                      |                                                             |     |
| 58 |                      |                      |                                                             |     |
| 59 |                      |                      |                                                             |     |
| 60 |                      |                      |                                                             |     |



|                                                                      |                                      |                      |                                                                                                                                                                                                                                    |   |
|----------------------------------------------------------------------|--------------------------------------|----------------------|------------------------------------------------------------------------------------------------------------------------------------------------------------------------------------------------------------------------------------|---|
| 1<br>2<br>3<br>4<br>5<br>6<br>7<br>8<br>9<br>10                      | Protocol amendments                  | <a href="#">#25</a>  | Plans for communicating important protocol modifications (eg, changes to eligibility criteria, outcomes, analyses) to relevant parties (eg, investigators, REC / IRBs, trial participants, trial registries, journals, regulators) | 5 |
| 11<br>12<br>13<br>14<br>15<br>16<br>17<br>18                         | Consent or assent                    | <a href="#">#26a</a> | Who will obtain informed consent or assent from potential trial participants or authorised surrogates, and how (see Item 32)                                                                                                       | 5 |
| 19<br>20<br>21<br>22<br>23<br>24<br>25                               | Consent or assent: ancillary studies | <a href="#">#26b</a> | Additional consent provisions for collection and use of participant data and biological specimens in ancillary studies, if applicable                                                                                              | 5 |
| 26<br>27<br>28<br>29<br>30<br>31<br>32<br>33<br>34<br>35             | Confidentiality                      | <a href="#">#27</a>  | How personal information about potential and enrolled participants will be collected, shared, and maintained in order to protect confidentiality before, during, and after the trial                                               | 7 |
| 36<br>37<br>38<br>39<br>40                                           | Declaration of interests             | <a href="#">#28</a>  | Financial and other competing interests for principal investigators for the overall trial and each study site                                                                                                                      | 9 |
| 41<br>42<br>43<br>44<br>45<br>46<br>47<br>48                         | Data access                          | <a href="#">#29</a>  | Statement of who will have access to the final trial dataset, and disclosure of contractual agreements that limit such access for investigators                                                                                    | 8 |
| 49<br>50<br>51<br>52<br>53<br>54<br>55<br>56<br>57<br>58<br>59<br>60 | Ancillary and post trial care        | <a href="#">#30</a>  | Provisions, if any, for ancillary and post-trial care, and for compensation to those who suffer harm from trial participation                                                                                                      | 8 |

|    |                       |                      |                                                               |     |
|----|-----------------------|----------------------|---------------------------------------------------------------|-----|
| 1  | Dissemination policy: | <a href="#">#31a</a> | Plans for investigators and sponsor to communicate trial      | 1   |
| 2  |                       |                      |                                                               |     |
| 3  | trial results         |                      | results to participants, healthcare professionals, the        |     |
| 4  |                       |                      | public, and other relevant groups (eg, via publication,       |     |
| 5  |                       |                      | reporting in results databases, or other data sharing         |     |
| 6  |                       |                      | arrangements), including any publication restrictions         |     |
| 7  |                       |                      |                                                               |     |
| 8  |                       |                      |                                                               |     |
| 9  |                       |                      |                                                               |     |
| 10 |                       |                      |                                                               |     |
| 11 |                       |                      |                                                               |     |
| 12 |                       |                      |                                                               |     |
| 13 | Dissemination policy: | <a href="#">#31b</a> | Authorship eligibility guidelines and any intended use of     | 1   |
| 14 | authorship            |                      | professional writers                                          |     |
| 15 |                       |                      |                                                               |     |
| 16 |                       |                      |                                                               |     |
| 17 |                       |                      |                                                               |     |
| 18 | Dissemination policy: | <a href="#">#31c</a> | Plans, if any, for granting public access to the full         | 8   |
| 19 | reproducible          |                      | protocol, participant-level dataset, and statistical code     |     |
| 20 |                       |                      |                                                               |     |
| 21 | research              |                      |                                                               |     |
| 22 |                       |                      |                                                               |     |
| 23 |                       |                      |                                                               |     |
| 24 |                       |                      |                                                               |     |
| 25 |                       |                      |                                                               |     |
| 26 | <b>Appendices</b>     |                      |                                                               |     |
| 27 |                       |                      |                                                               |     |
| 28 |                       |                      |                                                               |     |
| 29 | Informed consent      | <a href="#">#32</a>  | Model consent form and other related documentation            | 7   |
| 30 | materials             |                      | given to participants and authorised surrogates               |     |
| 31 |                       |                      |                                                               |     |
| 32 |                       |                      |                                                               |     |
| 33 |                       |                      |                                                               |     |
| 34 |                       |                      |                                                               |     |
| 35 | Biological specimens  | <a href="#">#33</a>  | Plans for collection, laboratory evaluation, and storage of   | n/a |
| 36 |                       |                      | biological specimens for genetic or molecular analysis in     |     |
| 37 |                       |                      | the current trial and for future use in ancillary studies, if |     |
| 38 |                       |                      | applicable                                                    |     |
| 39 |                       |                      |                                                               |     |
| 40 |                       |                      |                                                               |     |
| 41 |                       |                      |                                                               |     |
| 42 |                       |                      |                                                               |     |
| 43 |                       |                      |                                                               |     |
| 44 |                       |                      |                                                               |     |

45 The SPIRIT Explanation and Elaboration paper is distributed under the terms of the Creative  
 46 Commons Attribution License CC-BY-NC. This checklist was completed on 18. September 2023  
 47 using <https://www.goodreports.org/>, a tool made by the [EQUATOR Network](#) in collaboration with  
 48 [Penelope.ai](#)  
 49  
 50  
 51  
 52  
 53  
 54  
 55  
 56  
 57  
 58  
 59  
 60
